# Supplementary material for: A new practical approach towards the synthesis of unsymmetric and symmetric 1,10-phenanthroline derivatives at room temperature
Source: Royal Society of Chemistry journal article supplement (doi:10.1039/c2cc17208a), 2012-01-01

# **A New Practical Approach Towards the Synthesis of Unsymmetric and Symmetric 1,10-Phenanthroline Derivatives at Room Temperature**

Yongfeng Cheng,<sup>a,b</sup> Xuesong Han,<sup>a</sup> Huangche Ouyang,<sup>a</sup> and Yu Rao\*<sup>a</sup>

<sup>a</sup> *Department of Pharmacology and Pharmaceutical Sciences, School of Medicine and School of Life Sciences, Tsinghua University, Beijing 100084, China. E-mail: [yrao@mail.tsinghua.edu.cn](mailto:yrao@mail.tsinghua.edu.cn)*

<sup>b</sup> *Tianjin University of Traditional Chinese Medicine, Tianjin, 300193, China.*

## **Supporting Information**

| <b>Table of Contents</b>     | <b>Page</b>     |
|------------------------------|-----------------|
| <b>Materials and Methods</b> | <b>S1</b>       |
| <b>General procedure</b>     | <b>S1</b>       |
| <b>References</b>            | <b>S2</b>       |
| <b>Data of products</b>      | <b>S2 – S32</b> |

## Materials and Methods

8-aminoquinoline was purchased from Aladdin and purified by column chromatography, other commercial materials (Alfa Aesar, Aladdin, J&K Chemical LTD., Beijing Ouhe Technology Co.Ltd.) were used without further purification. All solvents were analytical grade. CH<sub>2</sub>Cl<sub>2</sub>, MeCN, MeOH, PhMe, DMSO and ClCH<sub>2</sub>CH<sub>2</sub>Cl were dried according to the procedure described in the fifth edition of <Purification of Laboratory Chemicals > by W.L.F. Armarego & C.L.L. Chai. <sup>[1]</sup>The <sup>1</sup>H NMR and <sup>13</sup>C NMR spectra were recorded on a JOEL JNM-ECA 300 MHz or BRUKE AVANCE 400 MHz spectrometer in CDCl<sub>3</sub> using TMS or solvent peak as a standard. All <sup>13</sup>C NMR spectra were recorded with complete proton decoupling. Low-resolution mass spectral analyses were performed with a Waters AQUITY UPLC<sup>TM</sup>/MS. Analytical TLC was performed on Yantai Chemical Industry Research Institute silica gel 60 F254 plates and flash column chromatography was performed on Qingdao Haiyang Chemical Co. Ltd silica gel 60 (200-300mesh). The rotavapor was BUCHI's Rotavapor R-3. Substituted 3-ethoxycyclobutanones<sup>[2],[3]</sup> and 2-azidoaniline<sup>[4]</sup> was prepared according to the literature reports.

## General procedure

### I Synthesis of substituted 8-aminoquinolines

2-azidoaniline (1.0 equiv) and substituted 3-ethoxycyclobutanones (2.0 equiv) were dissolved in anhydrous dichloromethane in a flame-dried round bottom flask which was coated with aluminum foil. Following that, BF<sub>3</sub>·OEt<sub>2</sub> (1.0 equiv) was added into the reaction solution. Then the reaction mixture was stirred at room temperature under atmosphere of Argon for 6 - 12 h. The reaction was monitored by TLC and LC-MS. After completion of the reaction, Et<sub>3</sub>N was added to quench the reaction. The reaction mixture was diluted with dichloromethane and washed once with saturated aqueous NaHCO<sub>3</sub>. Then organic layer was dried over Na<sub>2</sub>SO<sub>4</sub> and concentrated on rotavapor under reduced pressure. Finally the residue was purified by silica gel column chromatography to give substituted 8-azidoquinoline. then the substituted 8-azidoquinolines were added to a solution of triphenylphosphine in anhydrous methanol. The flask was also coated with aluminum foil. Then, the reaction was stirred at 50°C overnight. After all the starting material had disappeared, the reaction mixture was cooled to room temperature and the solvent was removed under reduced pressure. The residue was purified by silica gel column chromatography to give corresponding substituted 8-aminoquinolines.

### II Synthesis of 1,10-phenanthrolines

8-aminoquinoline or substituted 8-aminoquinolines (prepared by following the general procedure I) (1.0 equiv) and substituted 3-ethoxycyclobutanones (2.0 equiv) were dissolved in anhydrous dichloromethane in a flame-dried round bottom flask. Following that, crushed 4 Å molecular sieves (150% wt) was added quickly, then BF<sub>3</sub>·OEt<sub>2</sub> (1.0 equiv) was dropwised into the reaction solution. The reaction mixture was stirred at room temperature under atmosphere of Argon for 48 h. The reaction was monitored by TLC and LC-MS. After 48h, Et<sub>3</sub>N was added to quench the reaction. The reaction mixture was diluted with dichloromethane and filtered through SiO<sub>2</sub> then washed once with saturated aqueous NaHCO<sub>3</sub>. Then organic layer was dried over Na<sub>2</sub>SO<sub>4</sub> and concentrated on rotavapor under reduced pressure. Finally the residue was purified by silica gel column chromatography (Petroleum ether : EtOAc = 2 : 1, then DCM : MeOH = 80 : 1) to give corresponding 1,10-phenanthroline.

## References:

- [1] Wilfred L.F. Armarego .Christina L.L. Chai. <Purification of Laboratory Chemicals>, **fifth edition**.  
[2] J. Matsuo, S. Sasaki, T. Hoshikawa, H. Ishibashi. *Org. Lett.* 2009. **11**. 3822.  
[3] J. Matsuo, R. Okuno, K. Takeuchi, M. Kawano, H. Ishibashi. *Tetrahedron Lett.* 2010. **51**. 3736.  
[4] M. Shen, T. G. Driver. *Org. Lett.* 2008. **10** (15). 3367

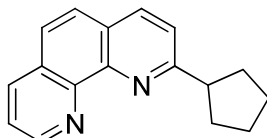

### 2-cyclopentyl-1,10-phenanthroline ( 3 )

Following the general procedure II , 3-ethoxy-spiro[3.4]octan-1-one (47 mg, 0.28 mmol), 8-aminoquinoline (20 mg, 0.14 mmol),  $\text{BF}_3 \cdot \text{OEt}_2$  (1.0 equiv, 0.14 mmol) and crushed 4 Å molecular sieves (150%wt) were used. The reaction mixture was stirred at room temperature under atmosphere of Argon for 48h. After completion of the reaction, the residue was purified by silical gel column chromatography (DCM : MeOH = 80 : 1). Finally, compound **3** (30 mg, colorless oil) was isolated in 87% yield.  $^1\text{H-NMR}$  (300 MHz,  $\text{CDCl}_3$ )  $\delta$  (ppm) 9.21 (dd,  $J = 1.59$  Hz,  $J = 4.32$  Hz, 1H), 8.23 (dd,  $J = 1.62$  Hz,  $J = 8.04$  Hz, 1H), 8.17 (d,  $J = 8.37$  Hz, 1H), 7.76 (d,  $J = 8.76$  Hz, 1H), 7.72 (d,  $J = 8.76$  Hz, 1H), 7.61 - 7.57 (m, 2H), 3.78 - 3.73 (m, 1H), 2.35 - 2.31 (m, 2H), 1.91 - 1.82 (m, 6H);  $^{13}\text{C-NMR}$  (75 MHz,  $\text{CDCl}_3$ )  $\delta$  (ppm) 167.4, 150.4, 146.2, 145.3, 136.5, 136.1, 128.9, 127.1, 126.5, 125.6, 122.7, 120.9, 49.5, 34.8, 26.3; MS (ESI) calcd for  $\text{C}_{17}\text{H}_{16}\text{N}_2$   $[\text{M}+\text{H}]^+$ : 249.13, found 249.07

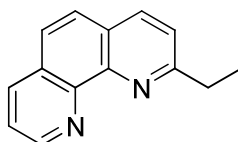

### 2-ethyl-1,10-phenanthroline ( 4 )

Following the general procedure II , 3-ethoxy-2-methylcyclobutanone (70 mg, 0.54 mmol), 8-aminoquinoline (39 mg, 0.27 mmol),  $\text{BF}_3 \cdot \text{OEt}_2$  (1.0 equiv, 0.27 mmol) and crushed 4 Å molecular sieves (150%wt) were used. The reaction mixture was stirred at room temperature under atmosphere of Argon for 48h. After completion of the reaction, the residue was purified by silical gel column chromatography (DCM : MeOH = 80 : 1). Finally, compound **4** (43 mg, colorless oil) was isolated in 76% yield.  $^1\text{H-NMR}$  (400 MHz,  $\text{CDCl}_3$ )  $\delta$  (ppm) 9.30 (d,  $J = 4.36$  Hz, 1H), 8.32 (d,  $J = 8.12$  Hz, 1H), 8.22 (d,  $J = 8.24$  Hz, 1H), 7.83 (d,  $J = 8.76$  Hz, 1H), 7.78 (d,  $J = 8.76$  Hz, 1H), 7.68 (dd,  $J = 4.48$  Hz,  $J = 8.04$  Hz, 1H), 6.62 (d,  $J = 8.24$  Hz, 1H), 3.25 (q,  $J = 7.64$  Hz, 2H), 1.46 (t,  $J = 7.64$  Hz, 3H);  $^{13}\text{C-NMR}$  (100 MHz,  $\text{CDCl}_3$ )  $\delta$  (ppm) 164.7, 150.1, 145.8, 145.4, 136.4, 136.3, 128.8, 126.9, 126.5, 125.4, 122.7, 122.3, 32.5, 14.5; MS (ESI) calcd for  $\text{C}_{14}\text{H}_{12}\text{N}_2$   $[\text{M}+\text{H}]^+$ : 209.10, found 209.00

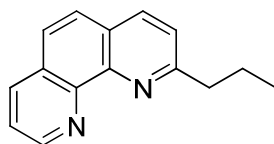

### 2-propyl-1,10-phenanthroline ( 5 )

Following the general procedure II, 3-ethoxy-2-ethylcyclobutanone (30 mg, 0.21 mmol), 8-aminoquinoline (15 mg, 0.10 mmol),  $\text{BF}_3 \cdot \text{OEt}_2$  (1.0 equiv, 0.10 mmol) and crushed 4 Å molecular sieves (150%wt) were used. The reaction mixture was stirred at room temperature under atmosphere of Argon for 48h. After completion of the reaction, the residue was purified by silical gel column chromatography (DCM : MeOH = 80 : 1). Finally, compound **5** (19 mg, colorless oil) was isolated in 82% yield.  $^1\text{H-NMR}$  (300 MHz,  $\text{CDCl}_3$ )  $\delta$  (ppm) 9.22 (d,  $J = 4.38$  Hz, 1H), 8.23 (d,  $J = 8.04$  Hz, 1H), 8.16 (d,  $J = 8.16$  Hz, 1H), 7.77 (d,  $J = 8.82$  Hz, 1H), 7.72 (d,  $J = 8.73$  Hz, 1H), 7.60 (dd,  $J = 4.29$  Hz,  $J = 7.92$  Hz, 1H), 7.54 (d,  $J = 8.22$  Hz, 1H) 3.19 (t,  $J = 7.56$  Hz, 2H), 1.93 - 1.89 (m, 2H), 1.08 (t,  $J = 6.54$  Hz, 3H);  $^{13}\text{C-NMR}$  (75 MHz,  $\text{CDCl}_3$ )  $\delta$  (ppm) 163.6, 150.4, 146.2, 145.9, 136.3, 136.1, 128.9, 127.0, 126.6, 125.6, 122.9, 122.7, 41.6, 23.8, 14.2; MS (ESI) calcd for  $\text{C}_{15}\text{H}_{14}\text{N}_2$   $[\text{M}+\text{H}]^+$ : 223.12, found 223.00

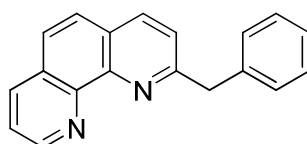

### 2-benzyl-1,10-phenanthroline ( 6 )

Following the general procedure II, 3-ethoxy-2-phenylcyclobutanone (66 mg, 0.35 mmol), 8-aminoquinoline (25 mg, 0.17 mmol),  $\text{BF}_3 \cdot \text{OEt}_2$  (1.0 equiv, 0.17 mmol) and crushed 4 Å molecular sieves (150%wt) were used. The reaction mixture was stirred at room temperature under atmosphere of Argon for 48h. After completion of the reaction, the residue was purified by silical gel column chromatography (DCM : MeOH = 80 : 1). Finally, compound **6** (40 mg, yellow oil) was isolated in 85% yield.  $^1\text{H-NMR}$  (400 MHz,  $\text{CDCl}_3$ )  $\delta$  (ppm) 9.27 (dd,  $J = 1.64$  Hz,  $J = 4.36$  Hz, 1H), 8.26 (dd,  $J = 1.04$  Hz,  $J = 8.04$  Hz, 1H), 8.10 (d,  $J = 8.28$  Hz, 1H), 7.75 (s, 2H), 7.64 (dd,  $J = 4.36$  Hz,  $J = 8.04$  Hz, 1H), 7.38 - 7.32 (m, 5H), 7.25 (t,  $J = 7.00$  Hz, 1H);  $^{13}\text{C-NMR}$  (100 MHz,  $\text{CDCl}_3$ )  $\delta$  (ppm) 162.2, 150.1, 145.7, 145.3, 139.5, 136.5, 129.6, 128.9, 128.7, 127.1, 126.6, 126.5, 125.8, 123.3, 122.9, 45.7; MS (ESI) calcd for  $\text{C}_{19}\text{H}_{14}\text{N}_2$   $[\text{M}+\text{H}]^+$ : 271.12, found 271.02

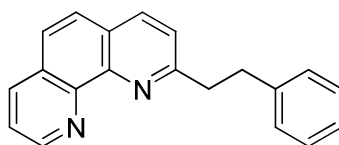

### 2-phenethyl-1,10-phenanthroline ( 7 )

Following the general procedure II, 3-ethoxy-2-benzylcyclobutanone (71 mg, 0.35 mmol), 8-aminoquinoline (25 mg, 0.17 mmol),  $\text{BF}_3 \cdot \text{OEt}_2$  (1.0 equiv, 0.17 mmol) and crushed 4 Å molecular sieves (150%wt) were used. The reaction mixture was stirred at room temperature under atmosphere of Argon for 48h. After completion of the reaction, the residue was purified by silical gel column chromatography (DCM : MeOH = 80 : 1). Finally, compound **7** (33 mg, yellow oil) was isolated in 67% yield.  $^1\text{H-NMR}$  (400 MHz,  $\text{CDCl}_3$ )  $\delta$  (ppm) 9.24 (dd,  $J = 1.72$  Hz,  $J =$

4.36 Hz, 1H), 8.24 (dd,  $J = 1.56$  Hz,  $J = 7.76$  Hz, 1H), 8.13 (d,  $J = 8.20$  Hz, 1H), 7.77 (d,  $J = 8.76$  Hz, 1H), 7.74 (d,  $J = 8.76$  Hz, 1H), 7.62 (dd,  $J = 4.36$  Hz,  $J = 8.04$  Hz, 1H), 7.46 (d,  $J = 8.20$  Hz, 1H), 7.30 - 7.29 (m, 4H), 7.23 - 7.21 (m, 1H), 3.57 - 3.53 (m, 2H), 3.26 - 3.22 (m, 2H);  $^{13}\text{C}$ -NMR (100 MHz,  $\text{CDCl}_3$ )  $\delta$  (ppm) 162.4, 150.4, 146.2, 145.9, 141.6, 136.3, 136.1, 128.9, 128.6, 128.4, 127.1, 126.5, 126.0, 125.7, 123.1, 122.8, 41.1, 36.5; MS (ESI) calcd for  $\text{C}_{20}\text{H}_{16}\text{N}_2$   $[\text{M}+\text{H}]^+$ : 285.13, found 285.02

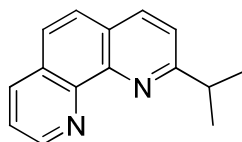

### 2-isopropyl-1,10-phenanthroline ( 8 )

Following the general procedure II, 3-ethoxy-2,2-dimethylcyclobutanone (49 mg, 0.35 mmol), 8-aminoquinoline (25 mg, 0.17 mmol),  $\text{BF}_3 \cdot \text{OEt}_2$  (1.0 equiv, 0.17 mmol) and crushed 4 Å molecular sieves (150%wt) were used. The reaction mixture was stirred at room temperature under atmosphere of Argon for 48h. After completion of the reaction, the residue was purified by silical gel column chromatography (DCM : MeOH = 80 : 1). Finally, compound **8** (29 mg, colorless oil) was isolated in 75% yield.  $^1\text{H}$ -NMR (400 MHz,  $\text{CDCl}_3$ )  $\delta$  (ppm) 9.20 - 9.18 (m,  $J = 1$  Hz), 8.16 - 8.12 (m, 2H), 7.70 - 7.63 (m, 2H), 7.56 - 7.52 (m, 2H), 3.68 - 3.61 (m, 1H), 1.43 (d,  $J = 6.96$  Hz, 6H);  $^{13}\text{C}$ -NMR (100 MHz,  $\text{CDCl}_3$ )  $\delta$  (ppm) 168.5, 150.2, 146.2, 145.3, 136.6, 135.9, 128.8, 127.1, 126.4, 125.5, 122.6, 120.0, 37.7, 23.2; MS (ESI) calcd for  $\text{C}_{15}\text{H}_{14}\text{N}_2$   $[\text{M}+\text{H}]^+$ : 223.12, found 223.03

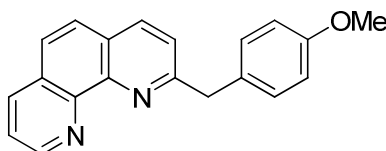

### 2-(4-methoxybenzyl)-1,10-phenanthroline ( 9 )

Following the general procedure II, 3-ethoxy-2-(4-methoxy-phenyl)-cyclobutanone (122 mg, 0.56 mmol), 8-aminoquinoline (40 mg, 0.28 mmol),  $\text{BF}_3 \cdot \text{OEt}_2$  (1.0 equiv, 0.28 mmol) and crushed 4 Å molecular sieves (150%wt) were used. The reaction mixture was stirred at room temperature under atmosphere of Argon for 48h. After completion of the reaction, the residue was purified by silical gel column chromatography (DCM : MeOH = 80 : 1). Finally, compound **9** (62 mg, slight yellow oil) was isolated in 74% yield.  $^1\text{H}$ -NMR (400 MHz,  $\text{CDCl}_3$ )  $\delta$  (ppm) 9.27 (dd,  $J = 1.76$  Hz,  $J = 4.36$  Hz, 1H), 8.27 (dd,  $J = 1.76$  Hz,  $J = 8.04$  Hz, 1H), 8.12 (d,  $J = 8.28$  Hz, 1H), 7.77 (s, 2H), 7.65 (dd,  $J = 4.36$  Hz,  $J = 8.08$  Hz, 1H), 7.38 (d,  $J = 8.32$  Hz, 1H), 7.29 (d,  $J = 8.92$  Hz, 2H), 6.89 (d,  $J = 8.68$  Hz, 2H), 4.61 (s, 2H), 3.82 (s, 3H);  $^{13}\text{C}$ -NMR (100 MHz,  $\text{CDCl}_3$ )  $\delta$  (ppm) 162.5, 158.3, 150.4, 146.2, 145.6, 136.4, 136.1, 131.7, 130.6, 128.9, 127.0, 126.5, 125.8, 123.1, 122.8, 114.1, 55.3, 44.8; MS (ESI) calcd for  $\text{C}_{20}\text{H}_{16}\text{N}_2\text{O}$   $[\text{M}+\text{H}]^+$ : 301.13, found 301.19

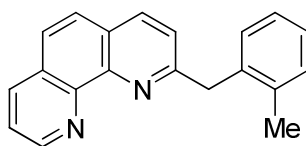

### 2-(2-methylbenzyl)-1,10-phenanthroline ( 10 )

Following the general procedure II, 3-ethoxy-2-o-tolyl-cyclobutanone (113 mg, 0.56 mmol), 8-aminoquinoline (40 mg, 0.28 mmol),  $\text{BF}_3 \cdot \text{OEt}_2$  (1.0 equiv, 0.28 mmol) and crushed 4 Å molecular sieves (150%wt) were used. The reaction mixture was stirred at room temperature under atmosphere of Argon for 48h. After completion of the reaction, the residue was purified by silical gel column chromatography (DCM : MeOH = 80 : 1). Finally, compound **10** (60 mg, slight yellow oil) was isolated in 76% yield.  $^1\text{H-NMR}$  (400 MHz,  $\text{CDCl}_3$ )  $\delta$  (ppm) 9.17 (dd,  $J = 1.76$  Hz,  $J = 4.36$  Hz, 1H), 8.09 (dd,  $J = 1.76$  Hz,  $J = 8.08$  Hz, 1H), 7.93 (d,  $J = 8.28$  Hz, 1H), 7.59 (s, 2H), 7.50 (dd,  $J = 4.36$  Hz,  $J = 8.04$  Hz, 1H), 7.17 - 7.09 (m, 6H), 4.62 (s, 2H), 2.22 (s, 3H);  $^{13}\text{C-NMR}$  (100 MHz,  $\text{CDCl}_3$ )  $\delta$ (ppm) 161.7, 150.3, 146.1, 145.7, 137.5, 136.5, 136.0, 130.5, 128.8, 126.9, 126.4, 126.2, 125.7, 122.7, 122.3, 43.5, 19.9; MS (ESI) calcd for  $\text{C}_{20}\text{H}_{16}\text{N}_2$   $[\text{M}+\text{H}]^+$ : 285.13, found 285.12

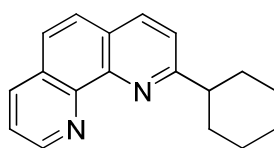

### 2-cyclohexyl-1,10-phenanthroline ( 11 )

Following the general procedure II, 3-ethoxy-spiro[3.5]nonan-1-one (38 mg, 0.21 mmol), 8-aminoquinoline (15 mg, 0.10 mmol),  $\text{BF}_3 \cdot \text{OEt}_2$  (1.0 equiv, 0.10 mmol) and crushed 4 Å molecular sieves (150%wt) were used. The reaction mixture was stirred at room temperature under atmosphere of Argon for 48h. After completion of the reaction, the residue was purified by silical gel column chromatography (DCM : MeOH = 80 : 1). Finally, compound **11** (18 mg, colorless oil) was isolated in 66% yield.  $^1\text{H-NMR}$  (400 MHz,  $\text{CDCl}_3$ )  $\delta$  (ppm) 9.25 (dd,  $J = 1.76$  Hz,  $J = 4.36$  Hz, 1H), 8.25 (dd,  $J = 1.52$  Hz,  $J = 8.04$  Hz, 1H), 8.20 (d,  $J = 8.32$  Hz, 1H), 7.78 (d,  $J = 8.76$  Hz, 1H), 7.74 (d,  $J = 8.72$  Hz, 1H), 7.62 (dd,  $J = 4.36$  Hz,  $J = 8.00$  Hz, 1H), 7.60 (d,  $J = 8.36$  Hz, 1H), 3.40 - 3.34 (m, 1H), 2.17 - 2.13 (m, 2H), 1.93 - 1.89 (m, 2H), 1.86 - 1.82 (m, 1H), 1.72 - 1.59 (m, 2H), 1.58 - 1.48 (m, 2H), 1.42 - 1.36 (m, 1H);  $^{13}\text{C-NMR}$  (100 MHz,  $\text{CDCl}_3$ )  $\delta$  (ppm) 167.6, 150.4, 146.3, 145.5, 136.5, 136.0, 128.8, 127.2, 126.5, 125.5, 122.6, 120.6, 47.9, 33.4, 26.5, 26.2; MS (ESI) calcd for  $\text{C}_{18}\text{H}_{18}\text{N}_2$   $[\text{M}+\text{H}]^+$ : 263.15, found 263.04

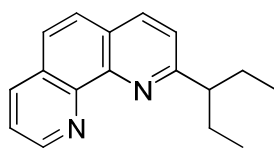

### 2-(pentan-3-yl)-1,10-phenanthroline ( 12 )

Following the general procedure II, 3-ethoxy-2,2-diethylcyclobutanone (38 mg, 0.22 mmol), 8-aminoquinoline (16 mg, 0.11 mmol),  $\text{BF}_3 \cdot \text{OEt}_2$  (1.0 equiv, 0.11 mmol) and crushed 4 Å molecular sieves (150%wt) were used. The reaction mixture was stirred at room temperature under atmosphere of Argon for 48h. After completion of the reaction, the residue was purified by silical gel column chromatography (DCM : MeOH = 80 : 1). Finally, compound **12** (22 mg, yellow oil) was isolated in 79% yield.  $^1\text{H-NMR}$  (400 MHz,  $\text{CDCl}_3$ )  $\delta$  (ppm) 9.27 (dd,  $J = 1.76$  Hz,  $J = 4.36$  Hz, 1H), 8.24 (dd,  $J = 1.64$  Hz,  $J = 8.04$  Hz, 1H), 8.19 (d,  $J = 8.32$  Hz, 1H), 7.78 (d,  $J = 8.72$  Hz, 1H), 7.74 (d,  $J = 8.76$  Hz, 1H), 7.61 (dd,  $J = 4.36$  Hz,  $J = 8.04$  Hz, 1H), 7.53 (d,  $J = 8.32$

Hz, 1H), 3.30 - 3.23 (m, 1H), 1.94 - 1.81 (m, 4H), 0.90 (t,  $J = 7.40$  Hz, 6H);  $^{13}\text{C}$ -NMR (100 MHz,  $\text{CDCl}_3$ )  $\delta$  (ppm) 166.8, 150.4, 146.4, 145.7, 136.1, 136.0, 128.9, 127.2, 126.5, 125.5, 122.6, 121.0, 51.7, 28.2, 12.1; MS (ESI) calcd for  $\text{C}_{17}\text{H}_{18}\text{N}_2$   $[\text{M}+\text{H}]^+$ : 251.15, found 251.03

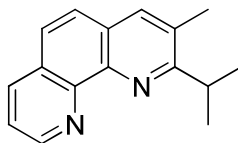

### 2-isopropyl-3-methyl-1,10-phenanthroline ( 13 )

Following the general procedure II, 3-ethoxy-2,2,4-trimethylcyclobutanone (44 mg, 0.28 mmol), 8-aminoquinoline (20 mg, 0.14 mmol),  $\text{BF}_3 \cdot \text{OEt}_2$  (1.0 equiv, 0.14 mmol) and crushed 4 Å molecular sieves (150%wt) were used. The reaction mixture was stirred at room temperature under atmosphere of Argon for 48h. After completion of the reaction, the residue was purified by silical gel column chromatography (DCM : MeOH = 80 : 1). Finally, compound **13** (16 mg, white solid) was isolated in 50% yield.  $^1\text{H}$ -NMR (300 MHz,  $\text{CDCl}_3$ )  $\delta$  (ppm) 9.20 (d,  $J = 4.38$  Hz, 1H), 8.19 (d,  $J = 8.01$  Hz, 1H), 7.91 (s, 1H), 7.69 (s, 2H), 7.56 (dd,  $J = 4.41$  Hz,  $J = 8.04$  Hz, 1H), 3.59 - 3.54 (m, 1H), 2.59 (s, 3H), 1.55 (d,  $J = 6.84$  Hz, 6H);  $^{13}\text{C}$ -NMR (75 MHz,  $\text{CDCl}_3$ )  $\delta$  (ppm) 166.5, 150.4, 146.6, 144.1, 136.7, 136.1, 131.0, 128.5, 127.4, 126.2, 125.6, 122.2, 33.3, 21.8, 19.3; MS (ESI) calcd for  $\text{C}_{16}\text{H}_{16}\text{N}_2$   $[\text{M}+\text{H}]^+$ : 237.13, found 237.07

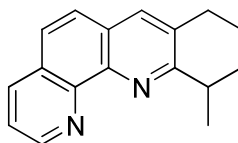

### 3-ethyl-2-isopropyl-1,10-phenanthroline ( 14 )

Following the general procedure II, 3-ethoxy-4-ethyl-2,2-dimethylcyclobutanone (71 mg, 0.42 mmol), 8-aminoquinoline (30 mg, 0.21 mmol),  $\text{BF}_3 \cdot \text{OEt}_2$  (1.0 equiv, 0.21 mmol) and crushed 4 Å molecular sieves (150%wt) were used. The reaction mixture was stirred at room temperature under atmosphere of Argon for 48h. After completion of the reaction, the residue was purified by silical gel column chromatography (DCM : MeOH = 80 : 1). Finally, compound **14** (27 mg, white solid) was isolated in 52% yield.  $^1\text{H}$ -NMR (400 MHz,  $\text{CDCl}_3$ )  $\delta$  (ppm) 9.24 (dd,  $J = 1.76$  Hz,  $J = 4.36$  Hz, 1H), 8.22 (dd,  $J = 1.76$  Hz,  $J = 8.04$  Hz, 1H), 7.97 (s, 1H), 7.75 (d,  $J = 8.76$  Hz, 1H), 7.70 (d,  $J = 8.72$  Hz, 1H), 7.58 (dd,  $J = 4.36$  Hz,  $J = 8.00$  Hz, 1H), 3.65 - 3.58 (m, 1H), 2.97 (q,  $J = 7.44$  Hz, 2H), 1.57 (d,  $J = 6.80$  Hz, 6H), 1.40 (t,  $J = 7.48$  Hz, 3H);  $^{13}\text{C}$ -NMR (100 MHz,  $\text{CDCl}_3$ )  $\delta$  (ppm) 166.2, 150.3, 146.5, 144.0, 136.6, 136.0, 134.7, 128.5, 127.5, 126.4, 125.5, 122.1, 32.3, 25.2, 22.5, 15.0; MS (ESI) calcd for  $\text{C}_{17}\text{H}_{18}\text{N}_2$   $[\text{M}+\text{H}]^+$ : 251.15, found 251.03

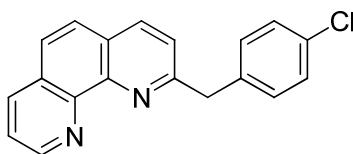

### 2-(4-chlorobenzyl)-1,10-phenanthroline ( 15 )

Following the general procedure II, 2-(4-chloro-phenyl)-3-ethoxy-cyclobutanone (125 mg, 0.56 mmol), 8-aminoquinoline (40 mg, 0.28 mmol),  $\text{BF}_3 \cdot \text{OEt}_2$  (1.0 equiv, 0.28 mmol) and crushed 4 Å

molecular sieves (150%wt) were used. The reaction mixture was stirred at room temperature under atmosphere of Argon for 48h. After completion of the reaction, the residue was purified by silical gel column chromatography (DCM : MeOH = 80 : 1). Finally, compound **15** (54 mg, slight yellow oil) was isolated in 64% yield. <sup>1</sup>H-NMR (400 MHz, CDCl<sub>3</sub>) δ (ppm) 9.26 (dd, *J* = 1.76 Hz, *J* = 4.36 Hz, 1H), 8.27 (dd, *J* = 1.76 Hz, *J* = 8.08 Hz, 1H), 8.13 (d, *J* = 8.28 Hz, 1H), 7.77 (s, 2H), 7.65 (dd, *J* = 4.40 Hz, *J* = 8.08 Hz, 1H), 7.35 (d, *J* = 8.28 Hz, 1H), 7.29 (s, 4H), 4.61 (s, 2H); <sup>13</sup>C-NMR (100 MHz, CDCl<sub>3</sub>) δ (ppm) 161.4, 150.5, 146.1, 145.7, 138.0, 136.7, 136.1, 132.4, 130.9, 128.9, 128.8, 127.1, 126.4, 126.1, 123.0, 122.9, 45.0; MS (ESI) calcd for C<sub>19</sub>H<sub>13</sub>ClN<sub>2</sub> [M+H]<sup>+</sup> : 305.08, found 305.04

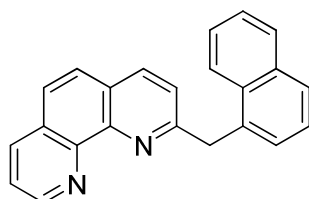

### 2-(naphthalen-1-ylmethyl)-1,10-phenanthroline ( **16** )

Following the general procedure **II**, 3-ethoxy-2-naphthalen-1-yl-cyclobutanone (133 mg, 0.56 mmol), 8-aminoquinoline (40 mg, 0.28 mmol), BF<sub>3</sub>·OEt<sub>2</sub> (1.0 equiv, 0.28 mmol) and crushed 4 Å molecular sieves (150%wt) were used. The reaction mixture was stirred at room temperature under atmosphere of Argon for 48h. After completion of the reaction, the residue was purified by silical gel column chromatography (DCM : MeOH = 40 : 1). Finally, compound **16** (42 mg, slight yellow oil) was isolated in 47% yield. <sup>1</sup>H-NMR (400 MHz, CDCl<sub>3</sub>) δ (ppm) 9.30 (dd, *J* = 1.68 Hz, *J* = 4.36 Hz, 1H), 8.27 (dd, *J* = 1.72 Hz, *J* = 8.08 Hz, 1H), 8.07 (d, *J* = 8.44 Hz, 1H), 7.99 (d, *J* = 8.32 Hz, 1H), 7.88 (d, *J* = 8.08 Hz, 1H), 7.83 (dd, *J* = 1.84 Hz, *J* = 7.20 Hz, 1H), 7.76 (d, *J* = 8.76 Hz, 1H), 7.72 (d, *J* = 8.76 Hz, 1H), 7.66 (dd, *J* = 4.36 Hz, *J* = 8.04 Hz, 1H), 7.43-7.52 (m, 3H), 7.38-7.40 (m, 1H), 7.16 (d, *J* = 8.32 Hz, 1H), 5.12 (s, 2H); <sup>13</sup>C-NMR (100 MHz, CDCl<sub>3</sub>) δ (ppm) 162.0, 150.5, 146.2, 145.8, 136.5, 136.1, 135.3, 134.1, 132.4, 128.9, 128.6, 128.2, 127.6, 127.0, 126.5, 126.2, 125.8, 125.7, 125.7, 124.9, 122.9, 122.6, 43.4; MS (ESI) calcd for C<sub>23</sub>H<sub>16</sub>N<sub>2</sub> [M+H]<sup>+</sup> : 321.13, found 321.11

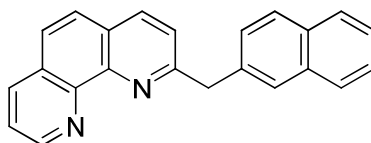

### 2-(naphthalen-2-ylmethyl)-1,10-phenanthroline ( **17** )

Following the general procedure **II**, 3-ethoxy-2-naphthalen-2-yl-cyclobutanone (133 mg, 0.56 mmol), 8-aminoquinoline (40 mg, 0.28 mmol), BF<sub>3</sub>·OEt<sub>2</sub> (1.0 equiv, 0.28 mmol) and crushed 4 Å molecular sieves (150%wt) were used. The reaction mixture was stirred at room temperature under atmosphere of Argon for 48h. After completion of the reaction, the residue was purified by silical gel column chromatography (DCM : MeOH = 80 : 1). Finally, compound **17** (39 mg, slight yellow oil) was isolated in 44% yield. <sup>1</sup>H-NMR (400 MHz, CDCl<sub>3</sub>) δ (ppm) 9.26 (dd, *J* = 1.68 Hz, *J* = 4.32 Hz, 1H), 8.20 (dd, *J* = 1.68 Hz, *J* = 8.08 Hz, 1H), 8.03 (d, *J* = 8.32 Hz, 1H), 7.76-7.80 (m, 4H), 7.70 (d, *J* = 1.44 Hz, 2H), 7.60 (dd, *J* = 4.36 Hz, *J* = 8.08 Hz, 1H), 7.41-7.47 (m, 3H), 7.35 (d, *J* = 8.28 Hz, 1H), 4.80 (s, 2H); <sup>13</sup>C-NMR (100 MHz, CDCl<sub>3</sub>) δ (ppm) 161.9, 150.4, 146.2, 145.7,

137.1, 136.5, 136.1, 133.7, 132.3, 128.9, 128.3, 128.0, 127.7, 127.6, 127.1, 126.5, 126.1, 125.9, 125.6, 123.3, 122.8, 45.9; MS (ESI) calcd for  $C_{23}H_{16}N_2$   $[M+H]^+$ : 321.13, found 321.07

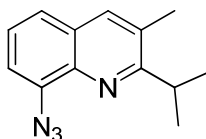

#### 8-azido-2-isopropyl-3-methylquinoline ( 20 )

Following the general procedure I , 3-ethoxy-2,2,4-trimethylcyclobutanone (47 mg, 0.30 mmol), 2-azidoaniline (20 mg, 0.15 mmol) and  $BF_3 \cdot OEt_2$  (1.0 equiv, 0.15 mmol) were used. The flask was coated with aluminum foil. The reaction mixture was stirred at room temperature under atmosphere of Argon for 12h. After completion of the reaction, the residue was purified by silical gel column chromatography (Petroleum ether : EtOAc = 80 : 1). Finally, compound **20** (16 mg, colorless oil) was isolated in 48% yield.  $^1H$ -NMR (400 MHz,  $CDCl_3$ )  $\delta$  (ppm) 7.83 (s, 1H), 7.44 (dd,  $J = 1.24$  Hz,  $J = 8.12$  Hz, 1H), 7.31 (t,  $J = 7.60$  Hz, 1H), 7.13 (dd,  $J = 1.28$  Hz,  $J = 7.48$  Hz, 1H), 3.45 - 3.38 (m, 1H), 2.51 (s, 3H), 1.37 (d,  $J = 6.72$  Hz, 6H);  $^{13}C$ -NMR (100 MHz,  $CDCl_3$ )  $\delta$  (ppm) 165.8, 141.0, 136.4, 136.2, 129.7, 128.1, 125.6, 123.0, 118.0, 32.8, 21.8, 19.2; MS (ESI) calcd for  $C_{13}H_{14}N_4$   $[M+H-N_2]^+$ : 199.12, found 199.05

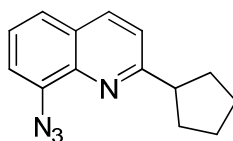

#### 8-azido-2-cyclopentylquinoline ( 21 )

Following the general procedure I , 3-ethoxyspiro[3.4]octan-1-one (75 mg, 0.45 mmol), 2-azidoaniline (30 mg, 0.22 mmol) and  $BF_3 \cdot OEt_2$  (1.0 equiv, 0.22 mmol) were used. The flask was coated with aluminum foil. The reaction mixture was stirred at room temperature under atmosphere of Argon for 6h. After completion of the reaction, the residue was purified by silical gel column chromatography (Petroleum ether : EtOAc = 80 : 1). Finally, compound **21** (38 mg, colorless oil) was isolated in 72% yield.  $^1H$ -NMR (400 MHz,  $CDCl_3$ )  $\delta$  (ppm) 8.06 (d,  $J = 8.52$  Hz, 1H), 7.53 (dd,  $J = 1.20$  Hz,  $J = 8.12$  Hz, 1H), 7.41 - 7.37 (m, 2H), 7.26 (dd,  $J = 1.28$  Hz,  $J = 7.48$  Hz, 1H), 3.48 - 3.39 (m, 1H), 2.20 - 2.15 (m, 2H), 1.99 - 1.88 (m, 4H), 1.77 - 1.74 (m, 2H);  $^{13}C$ -NMR (100 MHz,  $CDCl_3$ )  $\delta$  (ppm) 165.5, 141.6, 136.4, 127.8, 125.5, 123.8, 121.5, 118.7, 48.6, 33.4, 26.0; MS (ESI) calcd for  $C_{13}H_{16}N$   $[M+H-N_2]^+$ : 211.12, found 211.06

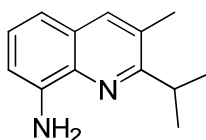

#### 2-isopropyl-3-methylquinolin-8-amine ( 23 )

Following the general procedure I , 8-azido-2-isopropyl-3-methylquinoline (18 mg, 0.08 mmol) were added to a solution of triphenylphosphine (25 mg, 0.10 mmol) in anhydrous methanol. The flask was coated with aluminum foil. Then, the reaction was stirred at 50°C overnight. After completion of the reaction, the residue was purified by silical gel column chromatography

(Petroleum ether : EtOAc = 40 : 1), Finally, compound **23** (14 mg, colorless oil) was isolated in 88% yield. <sup>1</sup>H-NMR (400 MHz, CDCl<sub>3</sub>) δ (ppm) 7.74 (s, 1H), 7.22 (t, *J* = 7.84 Hz, 1H), 7.04 (dd, *J* = 0.88 Hz, *J* = 8.12 Hz, 1H), 6.84 (dd, *J* = 0.96 Hz, *J* = 7.40 Hz, 1H), 4.97 (brs, 2H), 3.41 - 3.34 (m, 1H), 2.48 (s, 3H), 1.36 (d, *J* = 6.72 Hz, 6H); <sup>13</sup>C-NMR (100 MHz, CDCl<sub>3</sub>) δ (ppm) 163.4, 143.5, 136.6, 135.8, 129.1, 127.5, 126.3, 115.1, 109.0, 32.0, 21.9, 19.0; MS (ESI) calcd for C<sub>13</sub>H<sub>16</sub>N<sub>2</sub> [M+H]<sup>+</sup> : 201.13, found 201.05

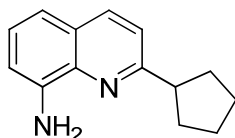

#### 2-cyclopentylquinolin-8-amine ( **24** )

Following the general procedure **I** , 8-azido-2-cyclopentylquinoline (33 mg, 0.14 mmol) were added to a solution of triphenylphosphine (44 mg, 0.17 mmol) in anhydrous methanol. The flask was coated with aluminum foil. Then, the reaction was stirred at 50°C overnight. After completion of the reaction, the residue was purified by silical gel column chromatography (Petroleum ether : EtOAc = 40 : 1), Finally, compound **24** (28 mg, colorless oil) was isolated in 95% yield. <sup>1</sup>H-NMR (400 MHz, CDCl<sub>3</sub>) δ (ppm) 7.98 (d, *J* = 8.48 Hz, 1H), 7.32 - 7.26 (m, 2H), 7.13 (dd, *J* = 1.08 Hz, *J* = 8.08 Hz, 1H), 6.93 (dd, *J* = 1.16 Hz, *J* = 7.44 Hz, 1H), 5.00 (brs, 2H), 3.41 - 3.35 (m, 1H), 2.20 - 2.13 (m, 2H), 2.01 - 1.85 (m, 4H), 1.79 - 7.74 (m, 2H); <sup>13</sup>C-NMR (100 MHz, CDCl<sub>3</sub>) δ (ppm) 163.2, 143.6, 137.6, 136.0, 127.2, 126.2, 121.0, 115.9, 110.0, 48.3, 33.4, 26.0; MS (ESI) calcd for C<sub>14</sub>H<sub>16</sub>N<sub>2</sub>[M+H]<sup>+</sup> : 213.13, found 213.09

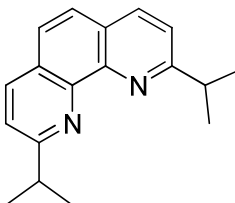

#### 2,9-diisopropyl-1,10-phenanthroline ( **25** )

Following the general procedure **II** , 3-ethoxy-2,2-dimethylcyclobutanone (28 mg, 0.20 mmol), 2-isopropyl-8-aminoquinoline (18 mg, 0.10 mmol), BF<sub>3</sub>·OEt<sub>2</sub> (1.0 equiv, 0.10 mmol) and crushed 4 Å molecular sieves (150%wt) were used. The reaction mixture was stirred at room temperature under atmosphere of Argon for 48h. After completion of the reaction, the residue was purified by silical gel column chromatography (Petroleum ether : EtOAc = 2 : 1). Finally, compound **25** (16 mg, colorless oil) was isolated in 62% yield. <sup>1</sup>H-NMR (400 MHz, CDCl<sub>3</sub>) δ (ppm) 8.16 (d, *J* = 8.32 Hz, 2H), 7.70 (s, 2H), 7.56 (d, *J* = 8.32 Hz, 2H), 3.61 - 3.54 (m, 2H), 1.49 (d, *J* = 6.96 Hz, 12H); <sup>13</sup>C-NMR (100 MHz, CDCl<sub>3</sub>) δ (ppm) 167.9, 145.3, 136.5, 127.3, 125.5, 120.1, 37.3, 22.9; MS (ESI) calcd for C<sub>18</sub>H<sub>20</sub>N<sub>2</sub> [M+H]<sup>+</sup> : 265.16, found 265.07

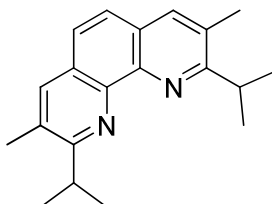

### 2,9-diisopropyl-3,8-dimethyl-1,10-phenanthroline ( **26** )

Following the general procedure **II**, 3-ethoxy-2,2,4-trimethylcyclobutanone (28 mg, 0.18 mmol), 2-isopropyl-3-methyl-8-aminoquinoline (18 mg, 0.09 mmol),  $\text{BF}_3 \cdot \text{OEt}_2$  (1.0 equiv, 0.09 mmol) and crushed 4 Å molecular sieves (150%wt) were used. The reaction mixture was stirred at room temperature under atmosphere of Argon for 48h. After completion of the reaction, the residue was purified by silical gel column chromatography (Petroleum ether : EtOAc = 20 : 1). Finally, compound **26** (14 mg, white solid) was isolated in 53% yield.  $^1\text{H-NMR}$  (400 MHz,  $\text{CDCl}_3$ )  $\delta$  (ppm) 7.85 (s, 2H), 7.59 (s, 2H), 3.53 – 3.46 (m, 2H), 2.55 (s, 6H), 1.53 (d,  $J$  = 6.72 Hz, 12H);  $^{13}\text{C-NMR}$  (100 MHz,  $\text{CDCl}_3$ )  $\delta$  (ppm) 165.5, 144.0, 136.1, 129.8, 127.0, 124.9, 32.8, 21.7, 19.0; MS (ESI) calcd for  $\text{C}_{18}\text{H}_{20}\text{N}_2$   $[\text{M}+\text{H}]^+$ : 265.16, found 265.07

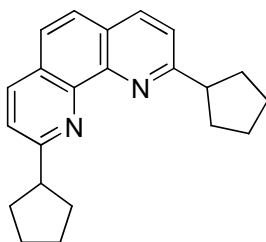

### 2,9-dicyclopentyl-1,10-phenanthroline ( **27** )

Following the general procedure **II**, 3-ethoxy-spiro[3.4]octan-1-one (40 mg, 0.24 mmol), 2-cyclopentyl-8-aminoquinoline (25 mg, 0.12 mmol),  $\text{BF}_3 \cdot \text{OEt}_2$  (1.0 equiv, 0.12 mmol) and crushed 4 Å molecular sieves (150%wt) were used. The reaction mixture was stirred at room temperature under atmosphere of Argon for 48h. After completion of the reaction, the residue was purified by silical gel column chromatography (Petroleum ether : EtOAc = 10 : 1). Finally, compound **27** (25 mg, white solid) was isolated in 68% yield.  $^1\text{H-NMR}$  (400 MHz,  $\text{CDCl}_3$ )  $\delta$  (ppm) 8.21 (d,  $J$  = 8.36 Hz, 2H), 7.74 (s, 2H), 7.60 (d,  $J$  = 8.40 Hz, 2H), 3.80 - 3.76 (m, 2H), 2.40 - 2.33 (m, 4H), 2.01 - 1.92 (m, 8H), 1.91 - 1.81 (m, 4H);  $^{13}\text{C-NMR}$  (100 MHz,  $\text{CDCl}_3$ )  $\delta$  (ppm) 167.0, 136.8, 127.3, 125.5, 121.4, 48.6, 34.2, 26.2; MS (ESI) calcd for  $\text{C}_{22}\text{H}_{24}\text{N}_2$   $[\text{M}+\text{H}]^+$ : 317.19, found 317.12

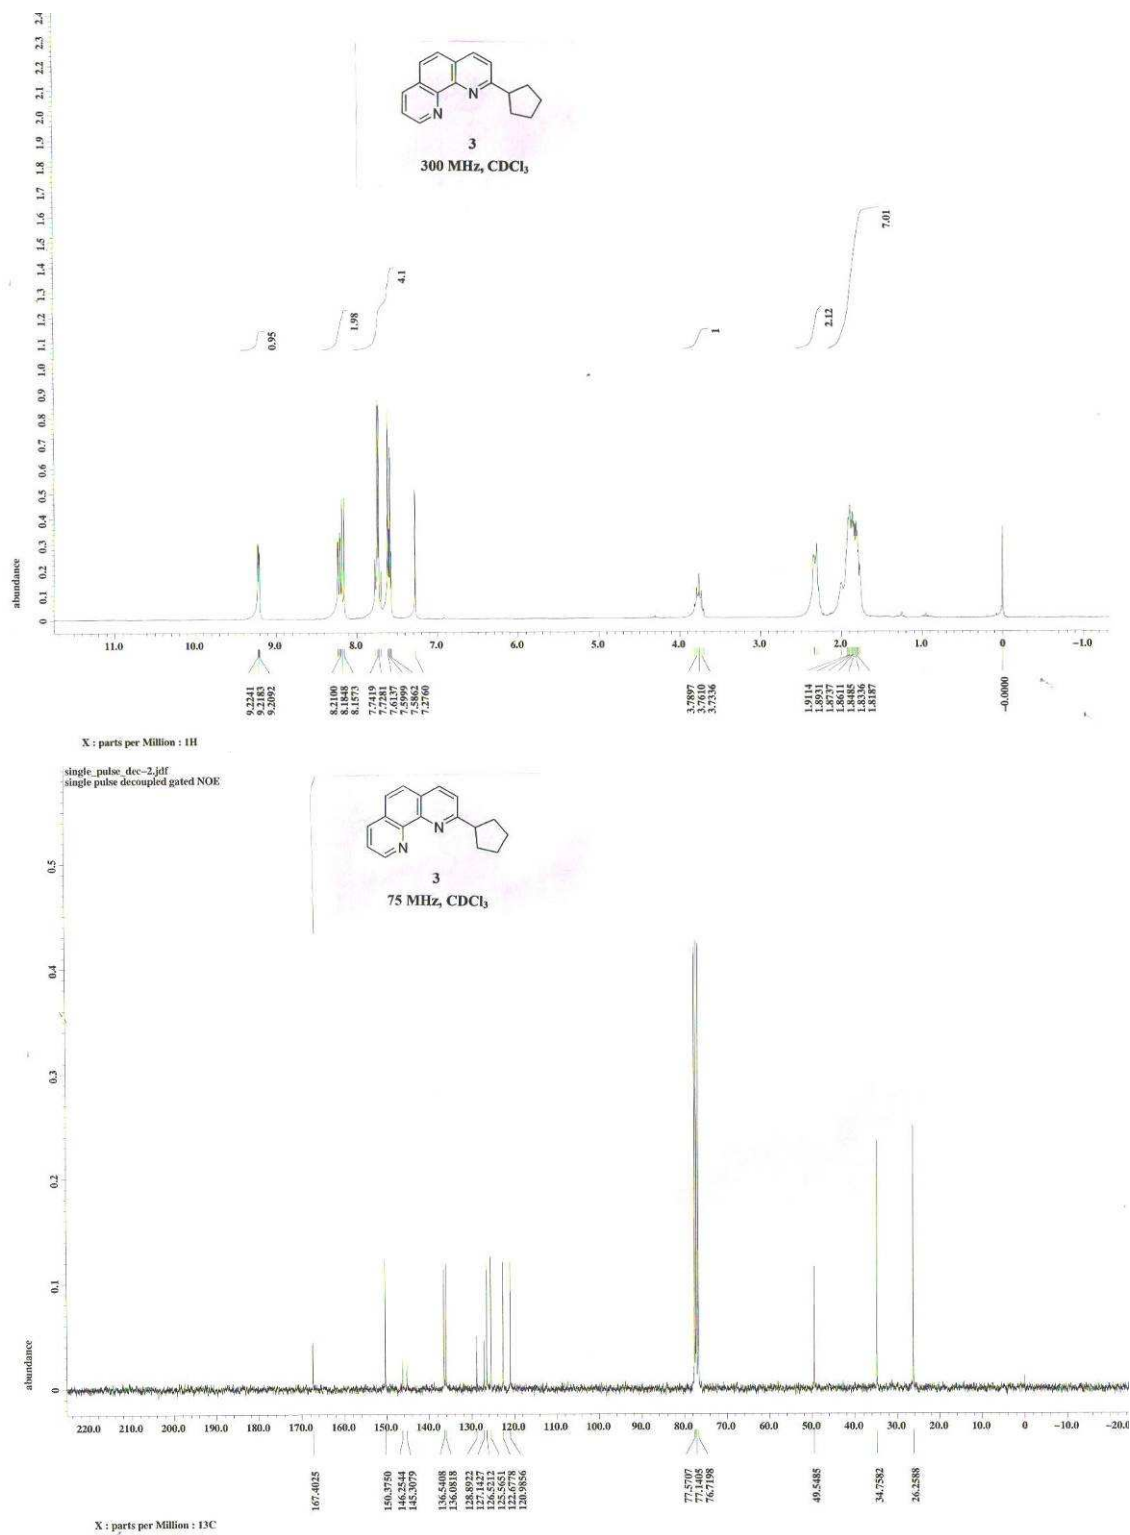

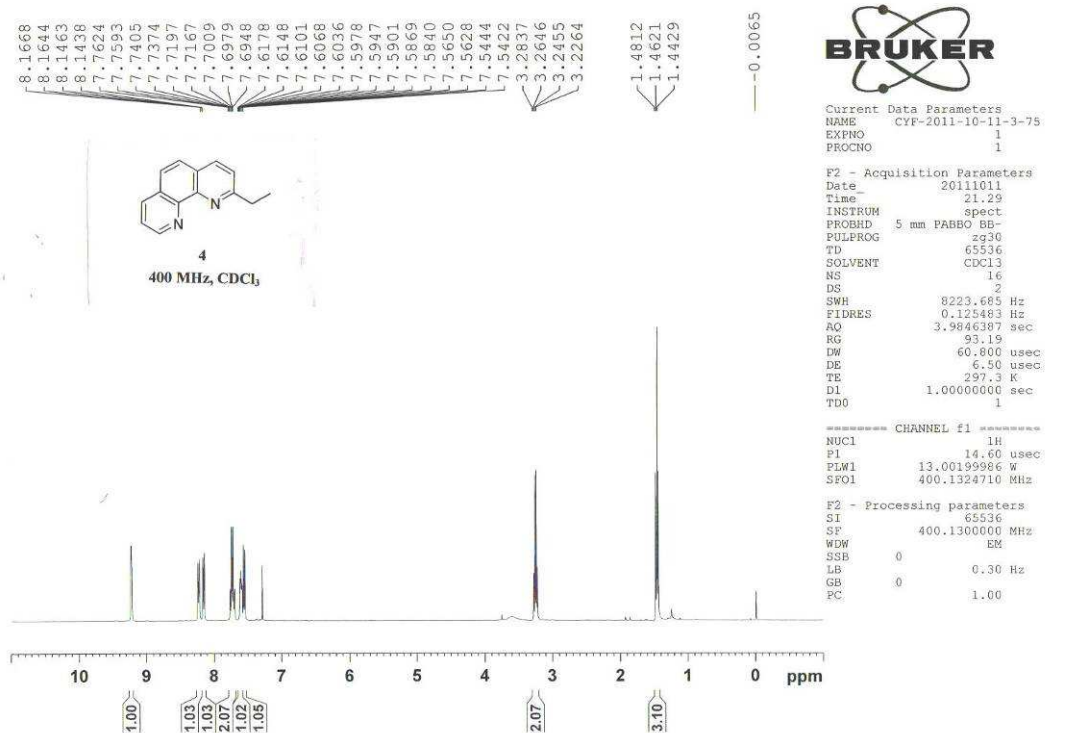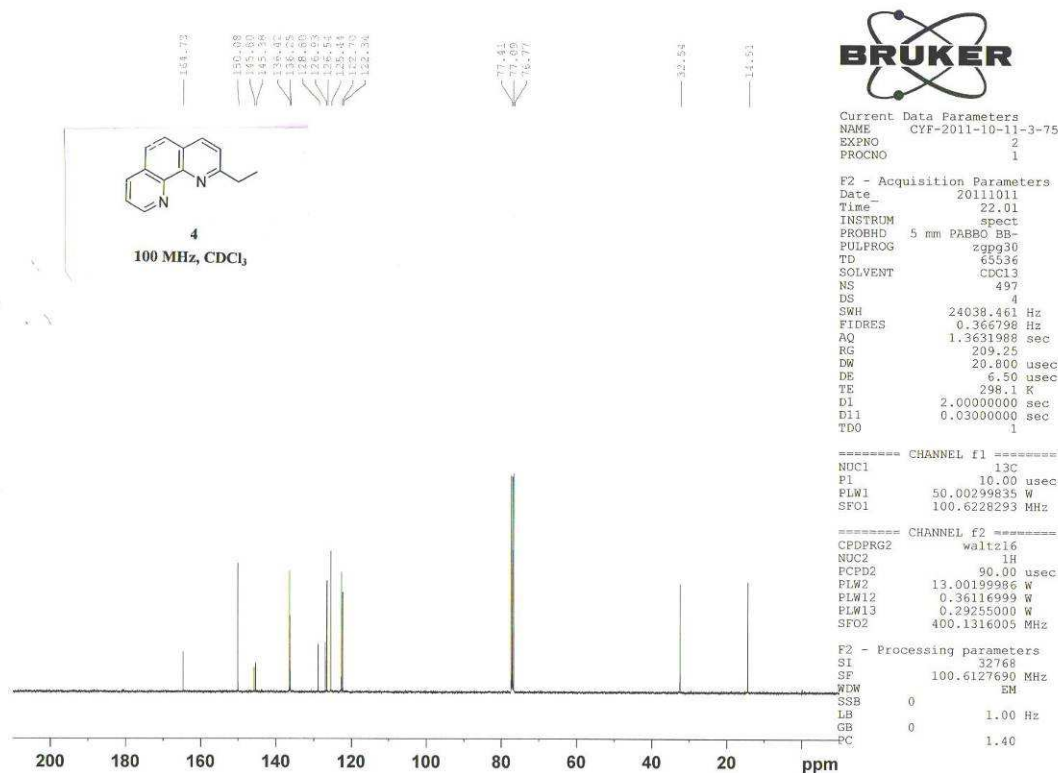

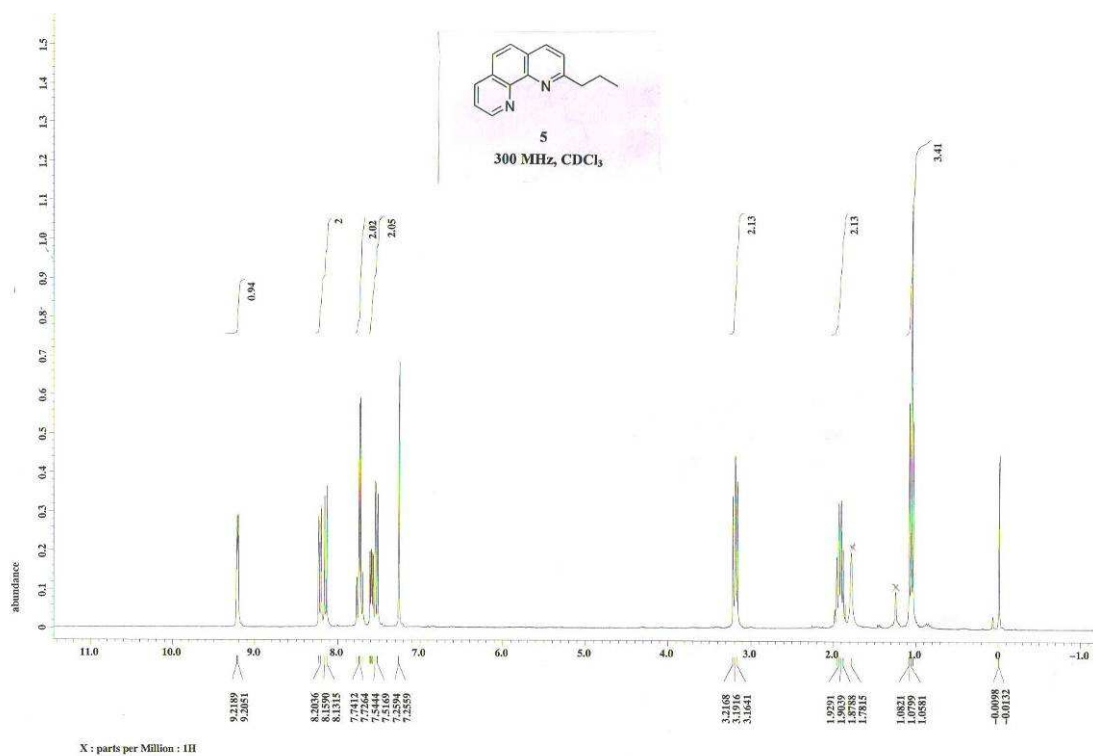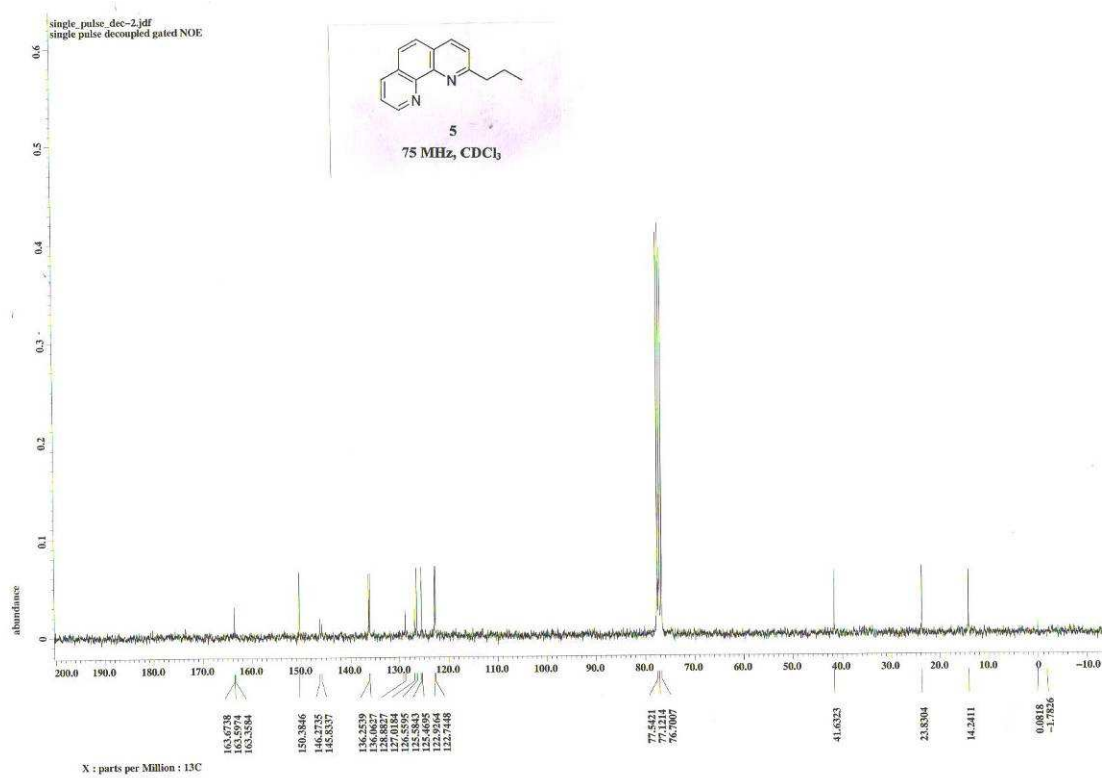

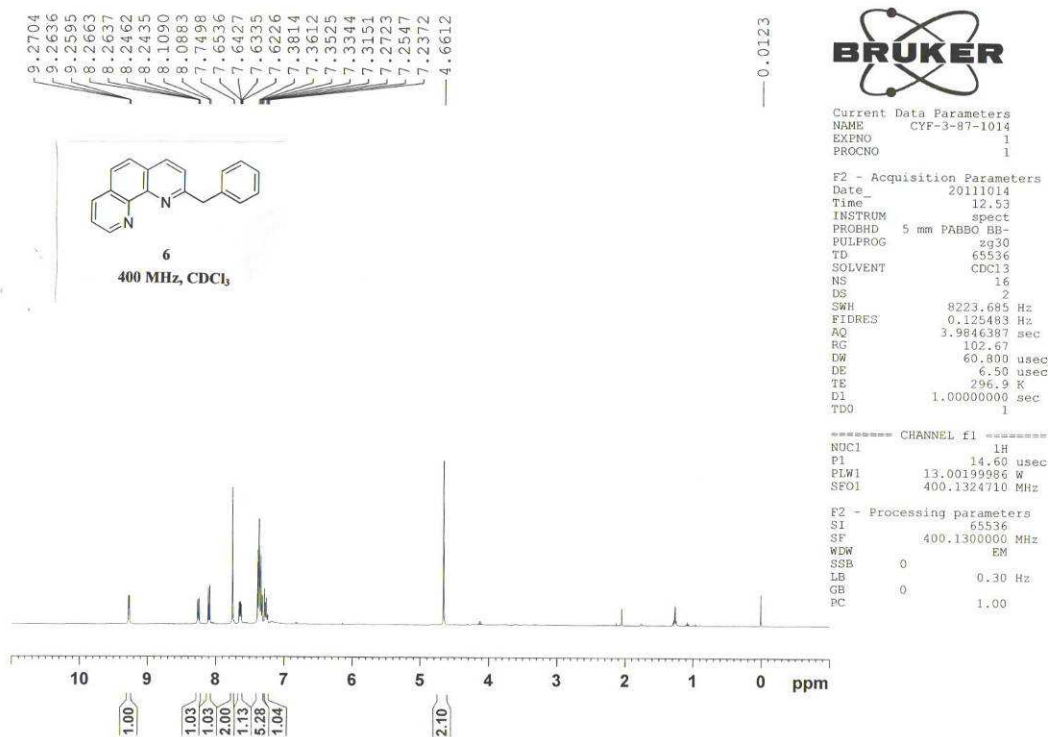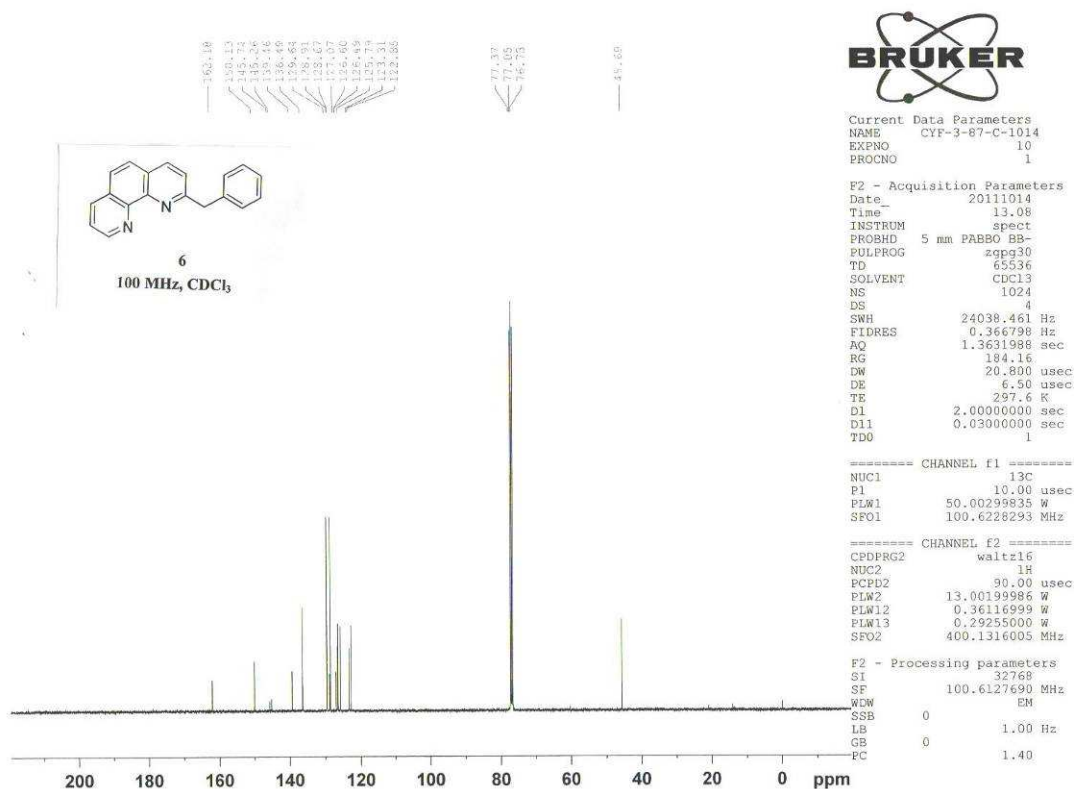

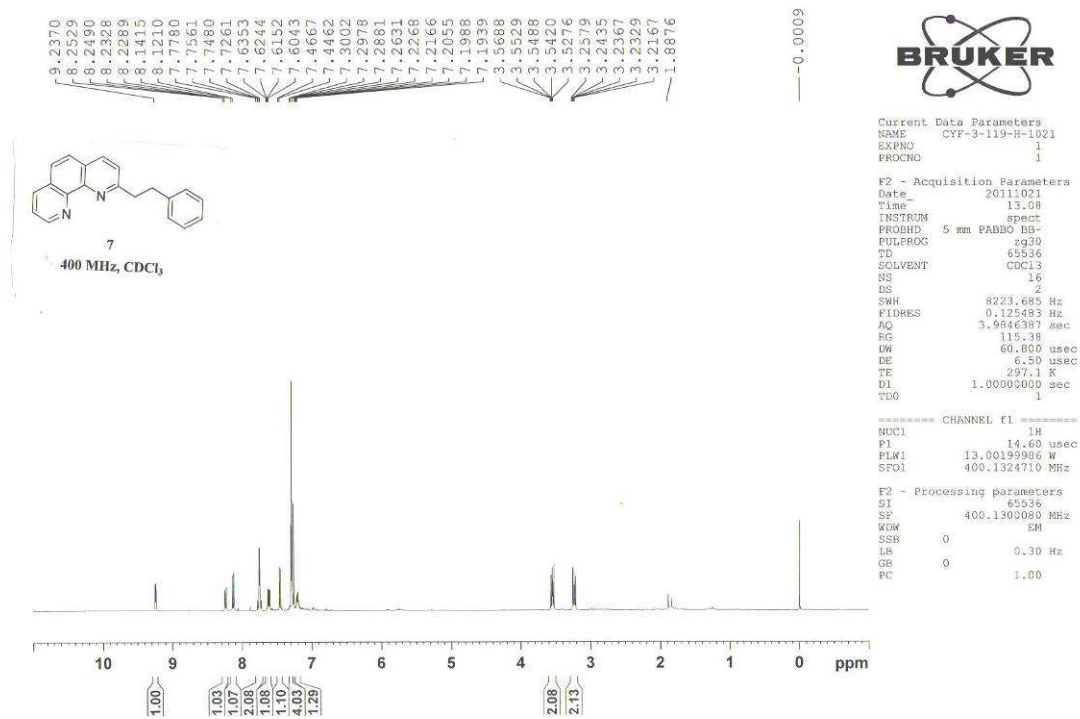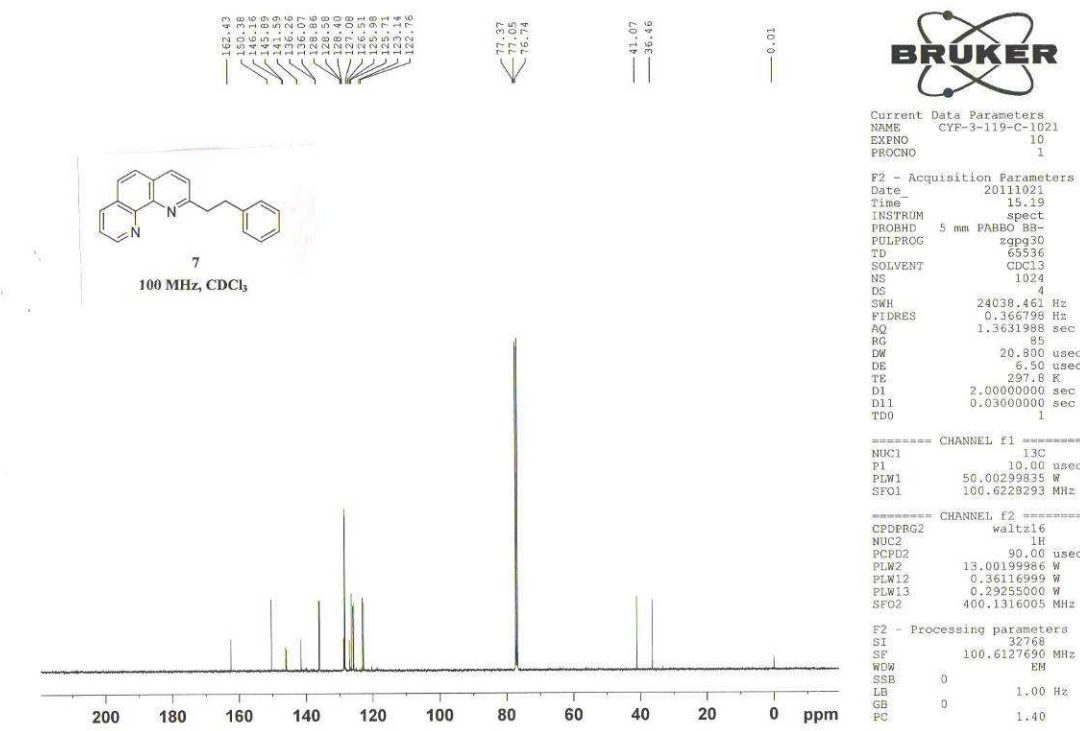

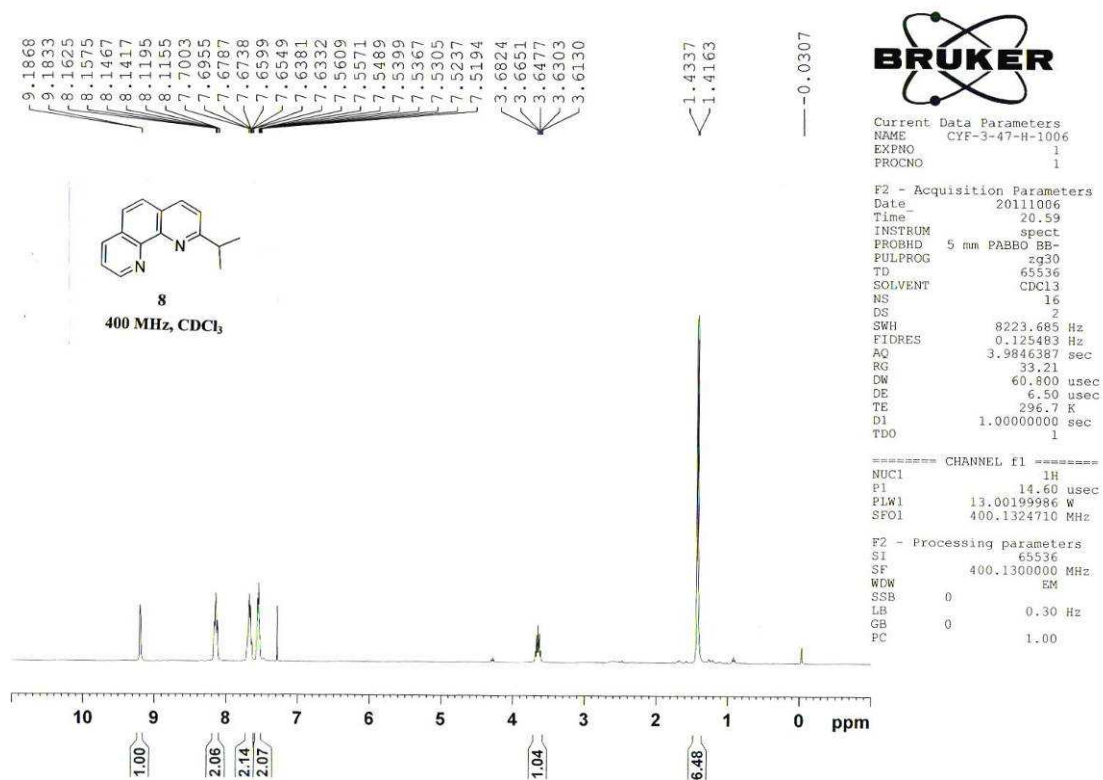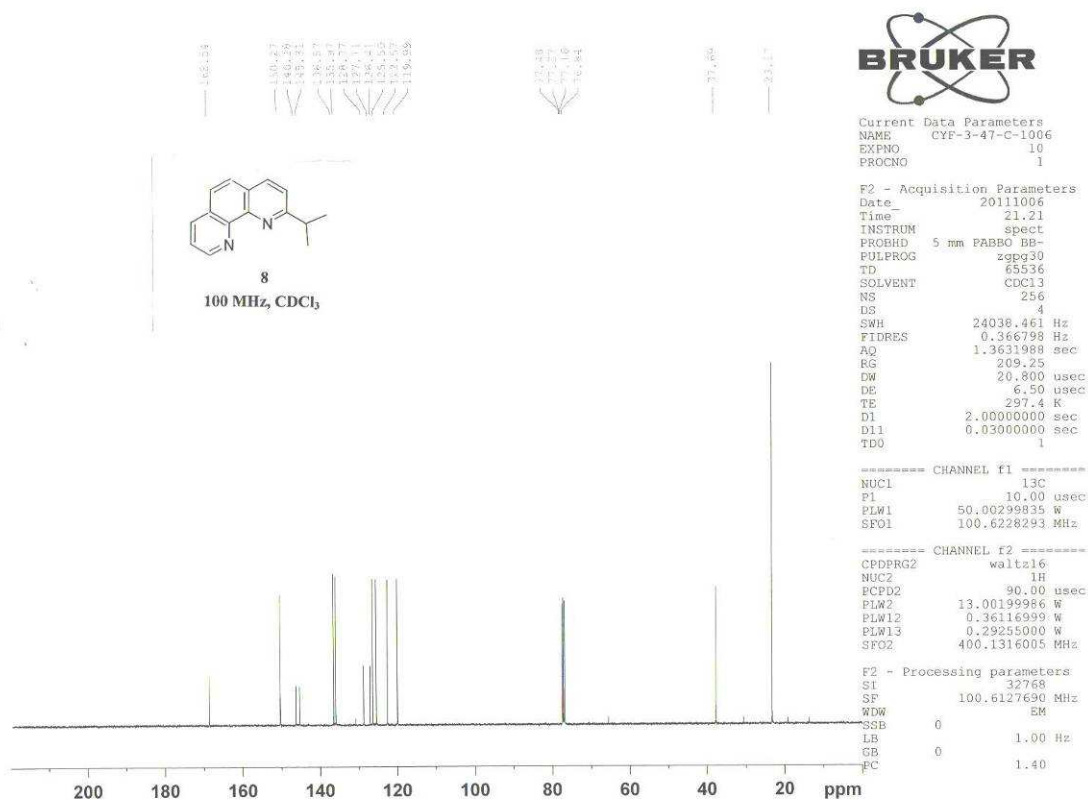

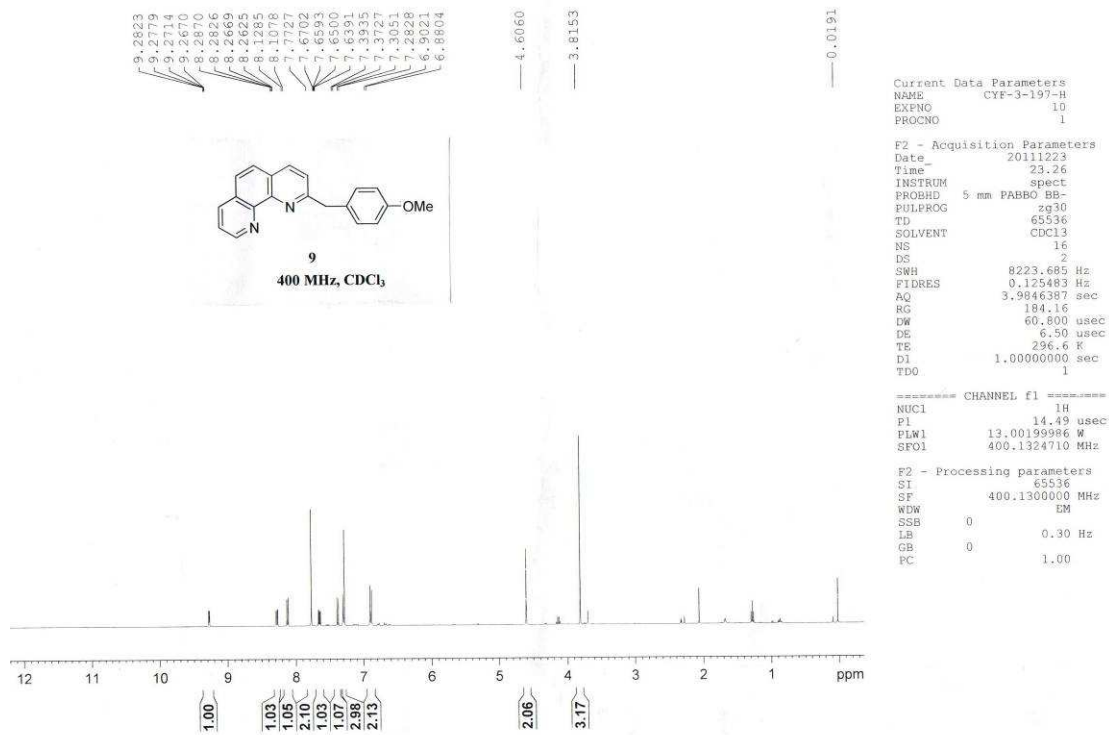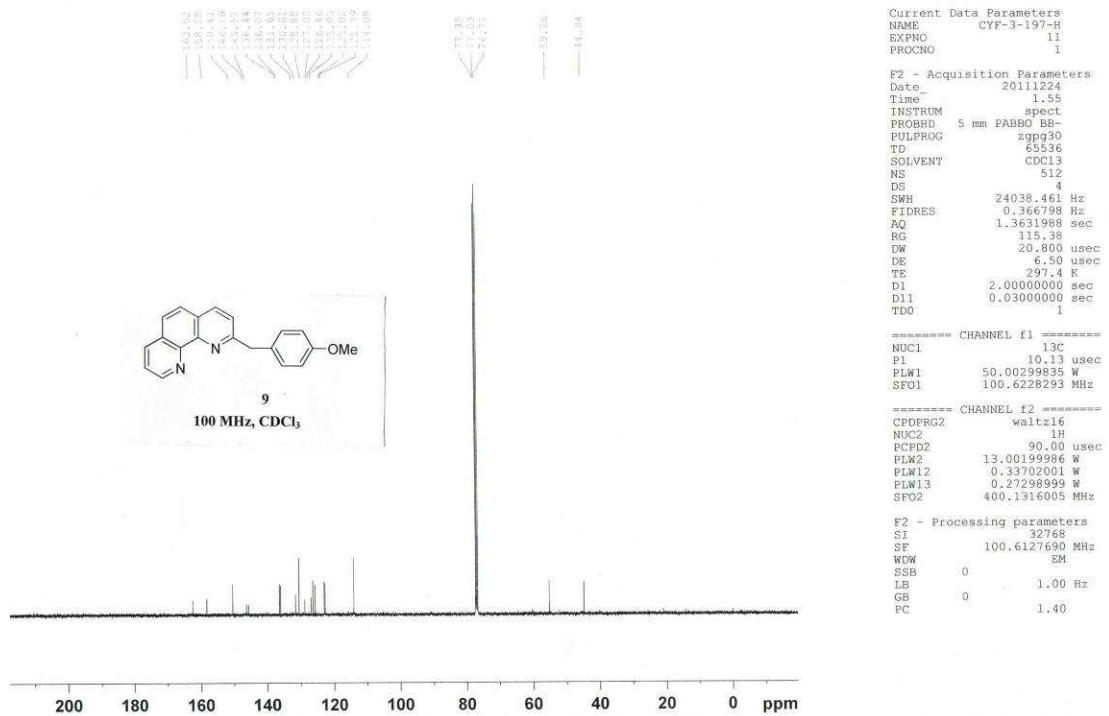

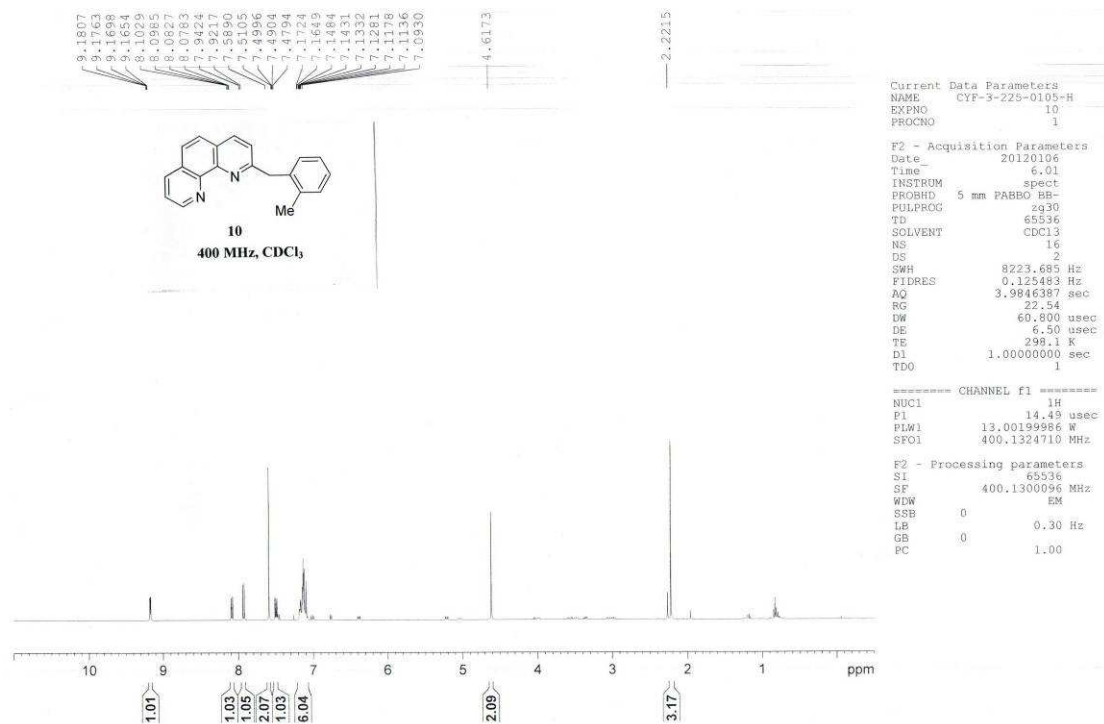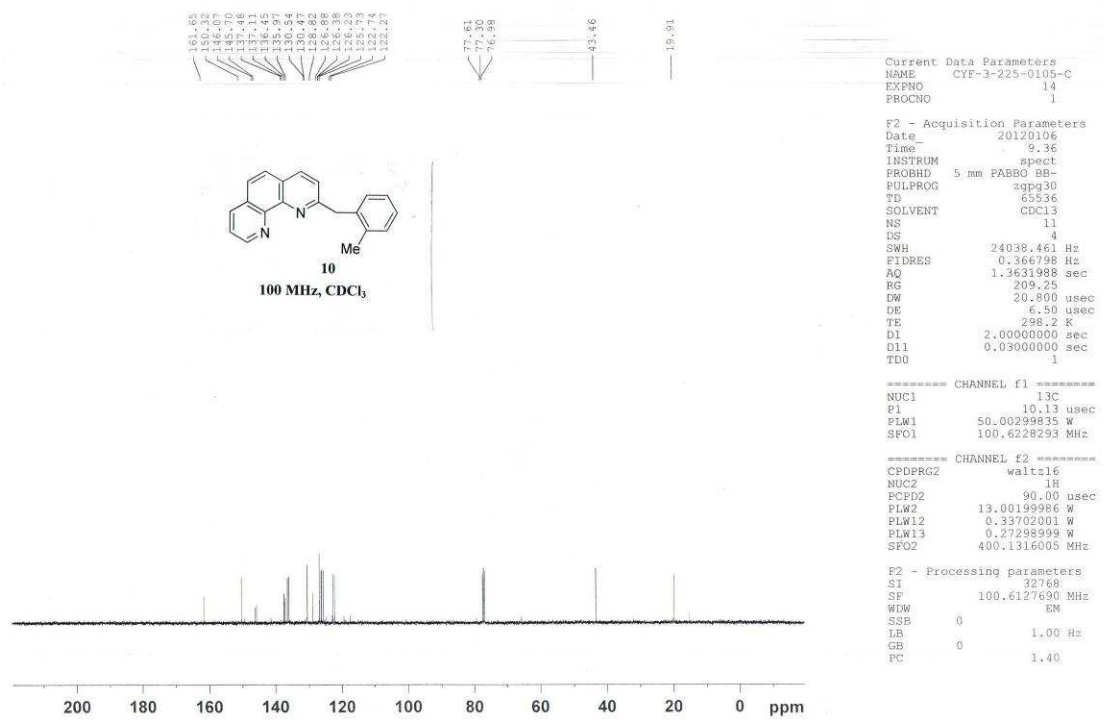

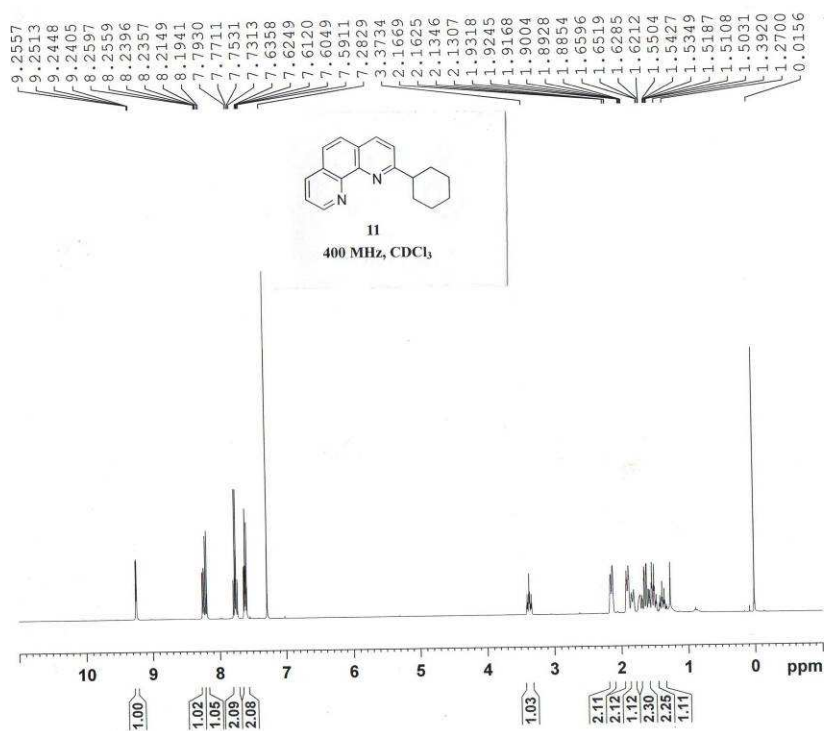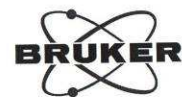

Current Data Parameters  
NAME CYF-3-55-H-1017  
EXPNO 12  
PROCNO 1

F2 - Acquisition Parameters  
Date\_ 20111017  
Time 21.26  
INSTRUM spect  
PROBHD 5 mm PABBO BB-  
PULPROG zg30  
TD 65536  
SOLVENT CDCl<sub>3</sub>  
NS 16  
DS 2  
SWH 8223.685 Hz  
FIDRES 0.125483 Hz  
AQ 3.9946387 sec  
RG 144.49  
DW 60.800 usec  
DE 6.50 usec  
TE 297.2 K  
D1 1.00000000 sec  
TD0 1

CHANNEL f1  
NUC1 1H  
P1 14.60 usec  
PLW1 13.00199986 W  
SFO1 400.1324710 MHz

F2 - Processing parameters  
SI 65536  
SF 400.1300000 MHz  
WDW EM  
SSB 0  
LB 0.30 Hz  
GB 0  
PC 1.00

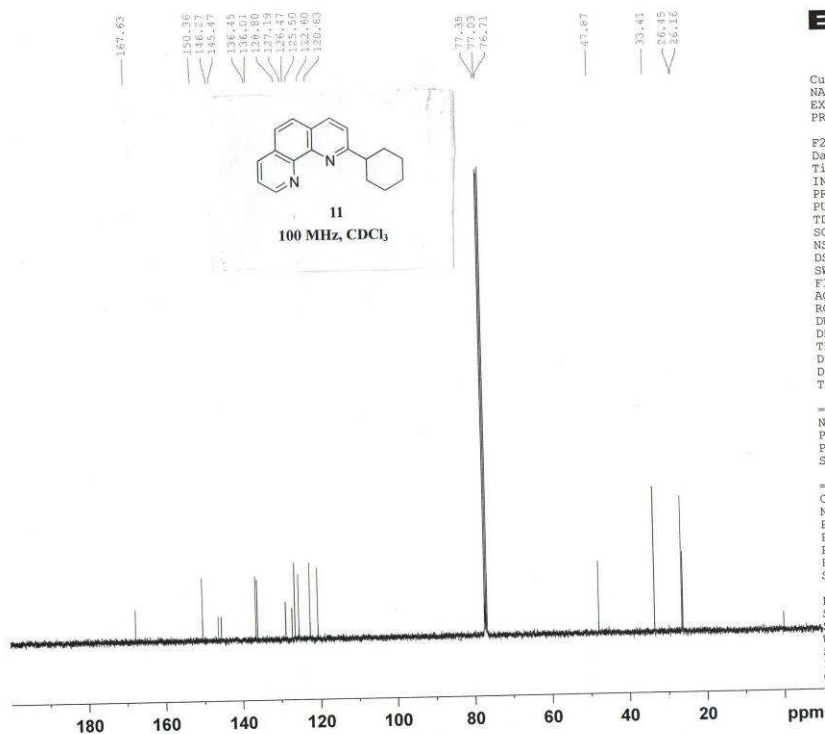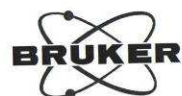

Current Data Parameters  
NAME CYF-3-55-C-1017  
EXPNO 13  
PROCNO 1

F2 - Acquisition Parameters  
Date\_ 20111017  
Time 21.46  
INSTRUM spect  
PROBHD 5 mm PABBO BB-  
PULPROG zgpg30  
TD 65536  
SOLVENT CDCl<sub>3</sub>  
NS 315  
DS 4  
SWH 24038.461 Hz  
FIDRES 0.366798 Hz  
AQ 1.3631988 sec  
RG 209.25  
DW 20.800 usec  
DE 6.50 usec  
TE 298.0 K  
D1 2.00000000 sec  
D11 0.03000000 sec  
TD0 1

CHANNEL f1  
NUC1 13C  
P1 10.00 usec  
PLW1 50.00299835 W  
SFO1 100.6228293 MHz

CHANNEL f2  
CPDPRG2 waltz16  
NUC2 1H  
PCPD2 90.00 usec  
PLW2 13.00199986 W  
PLW12 0.36116999 W  
PLW13 0.29255000 W  
SFO2 400.1316005 MHz

F2 - Processing parameters  
SI 32768  
SF 100.6127690 MHz  
WDW EM  
SSB 0  
LB 1.00 Hz  
GB 0  
PC 1.40

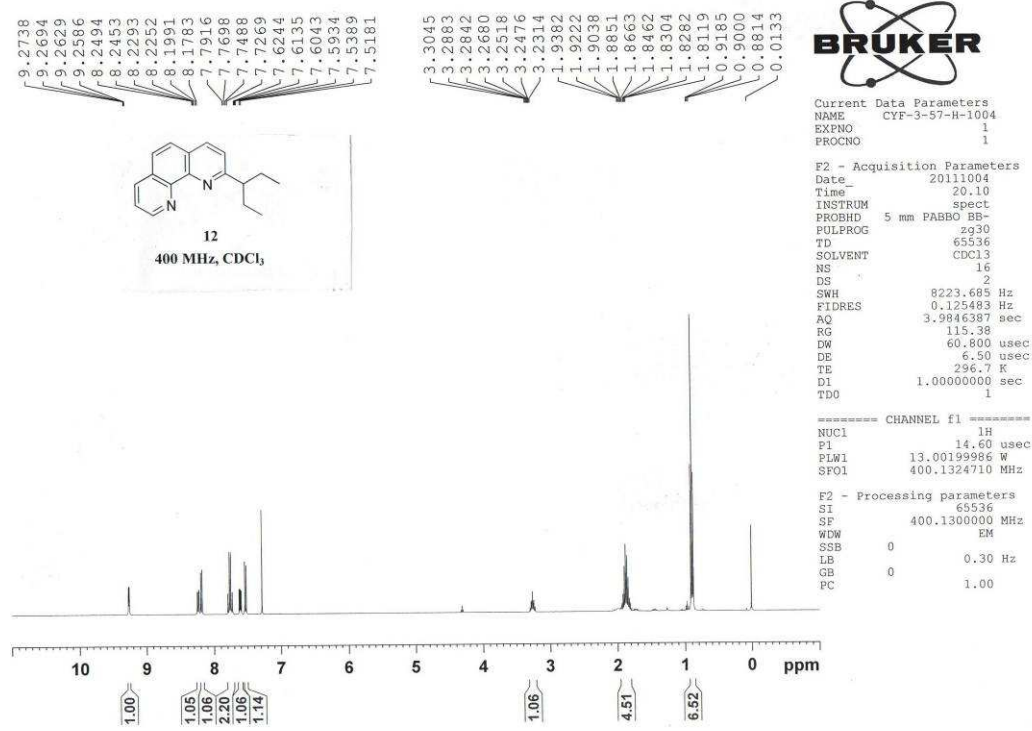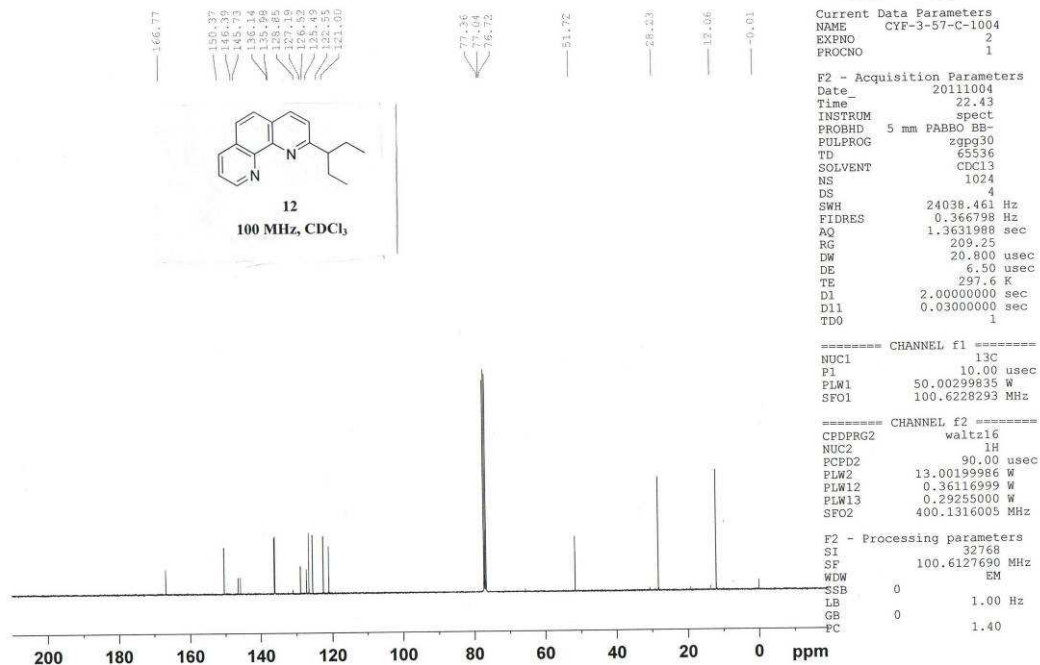

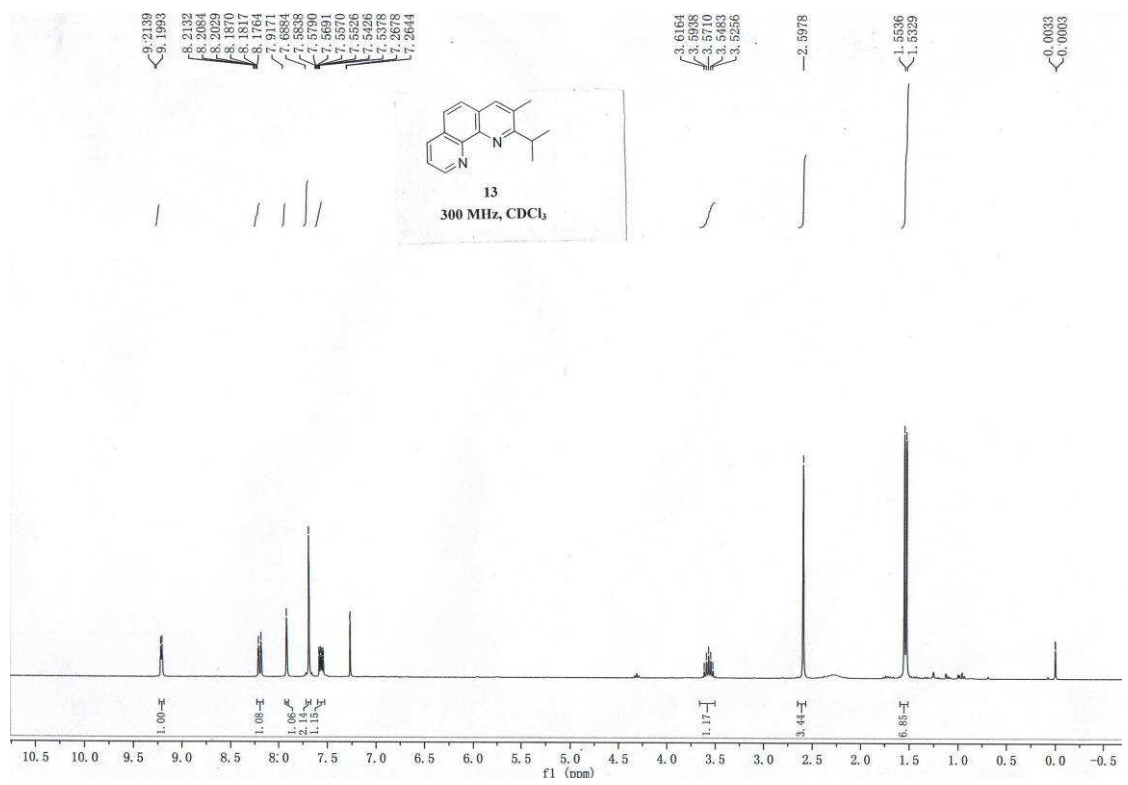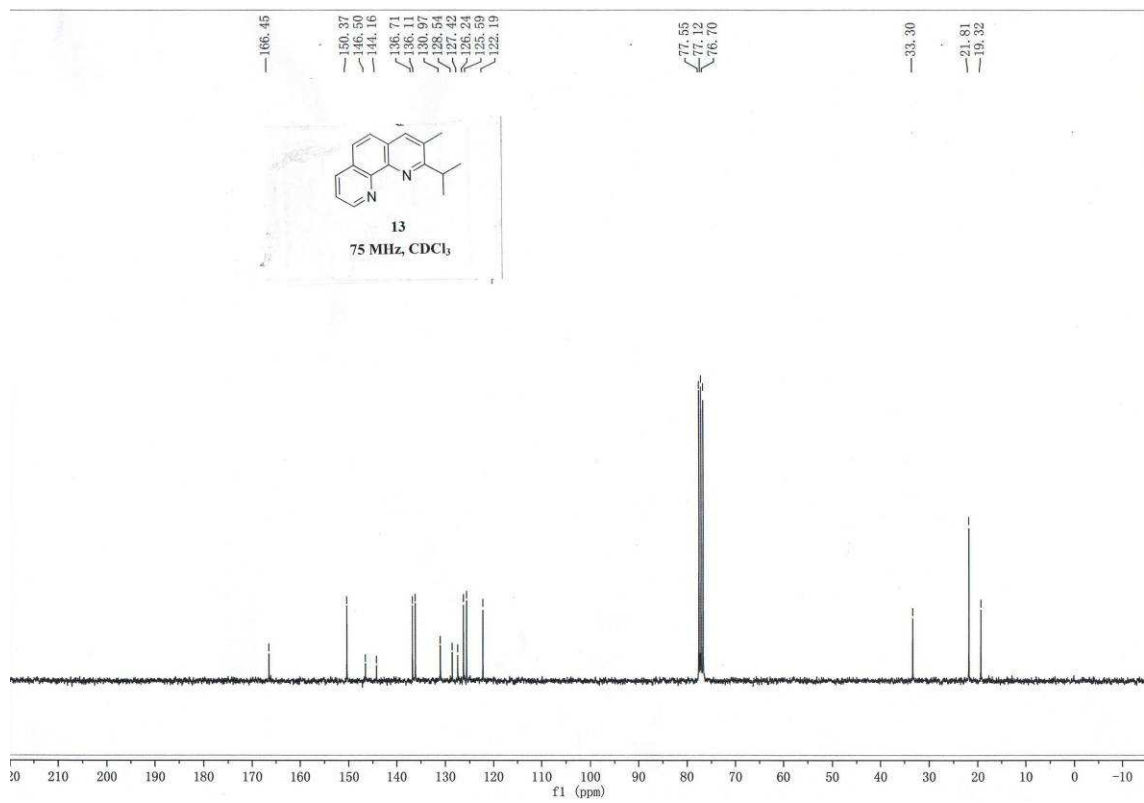

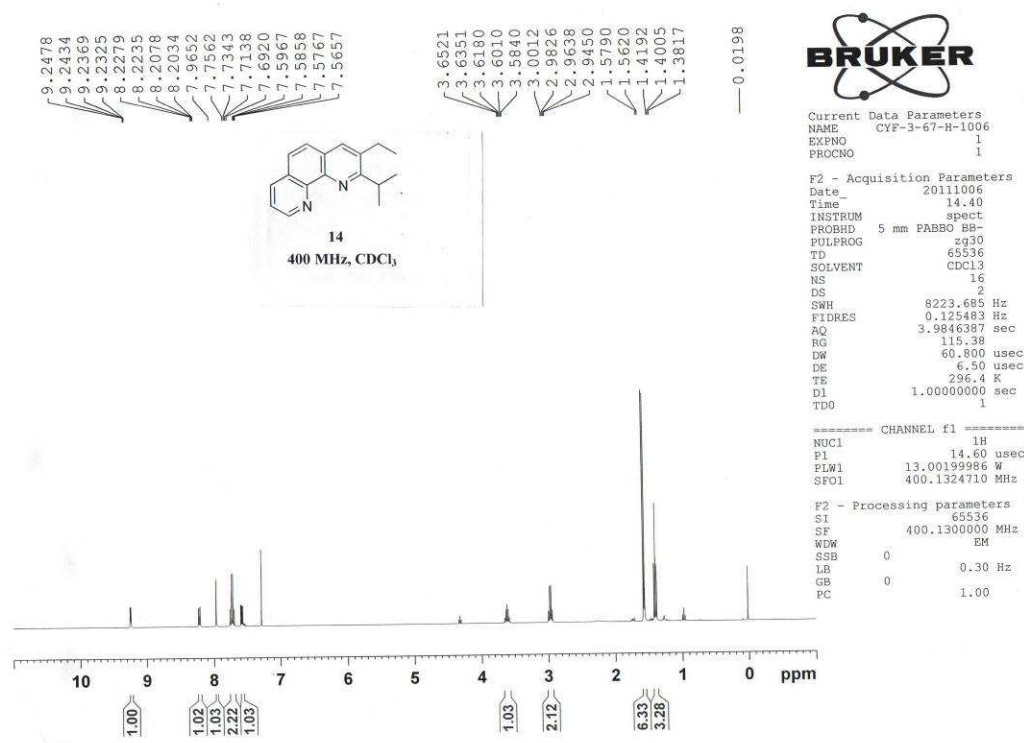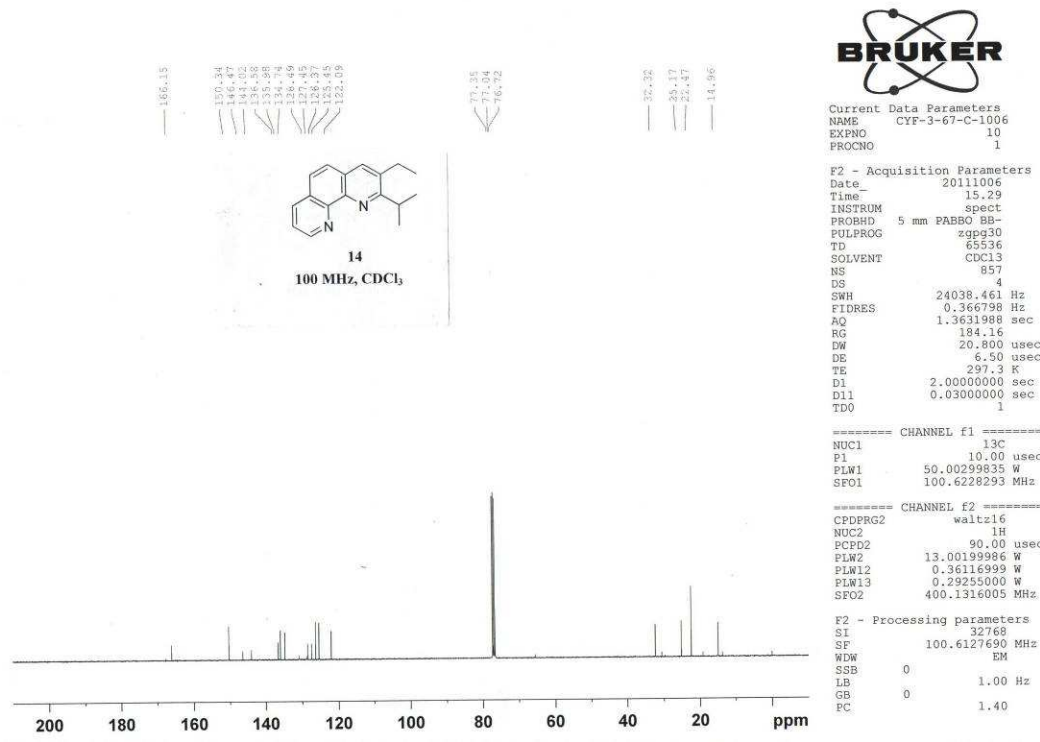

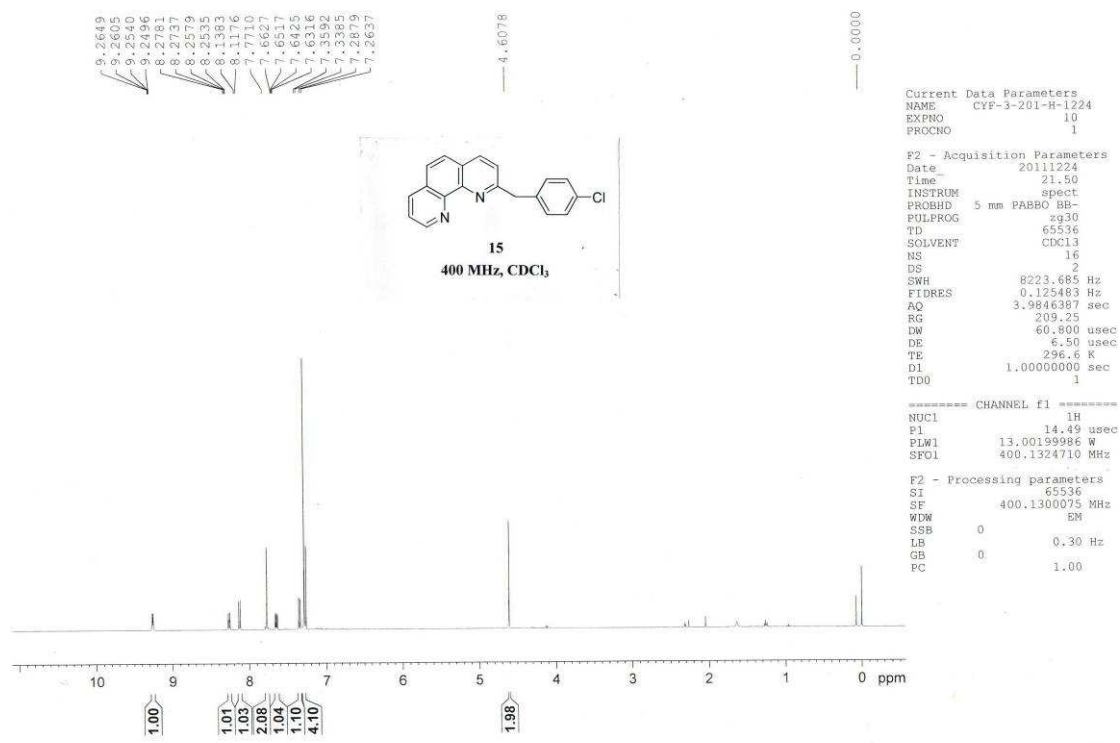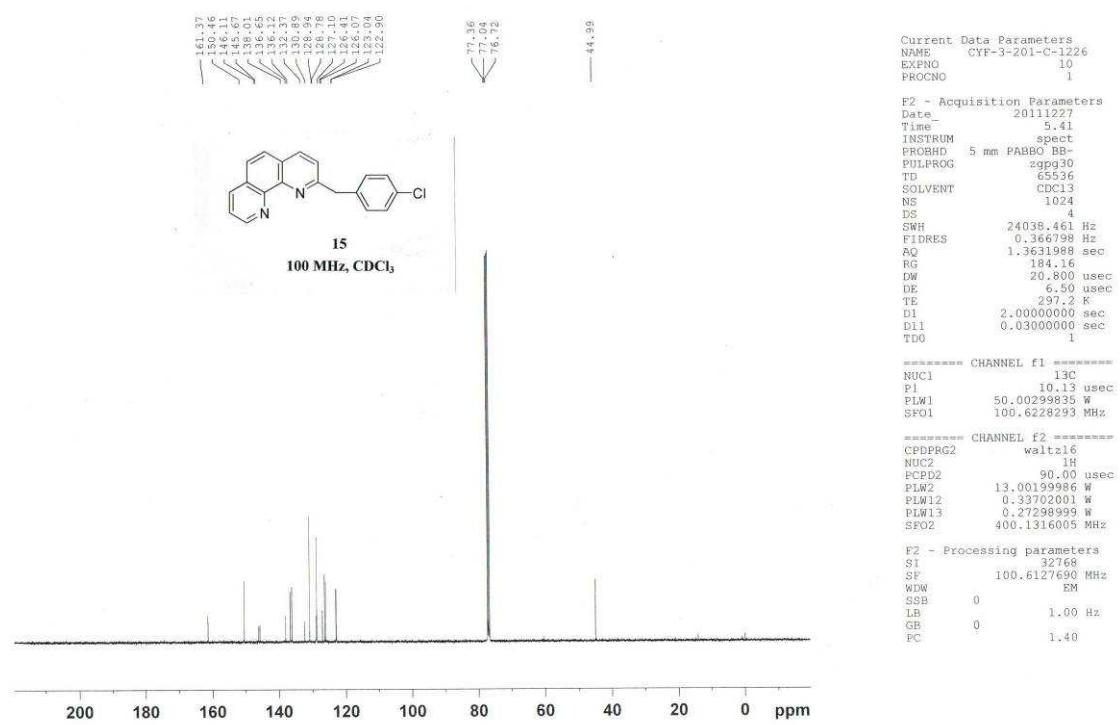

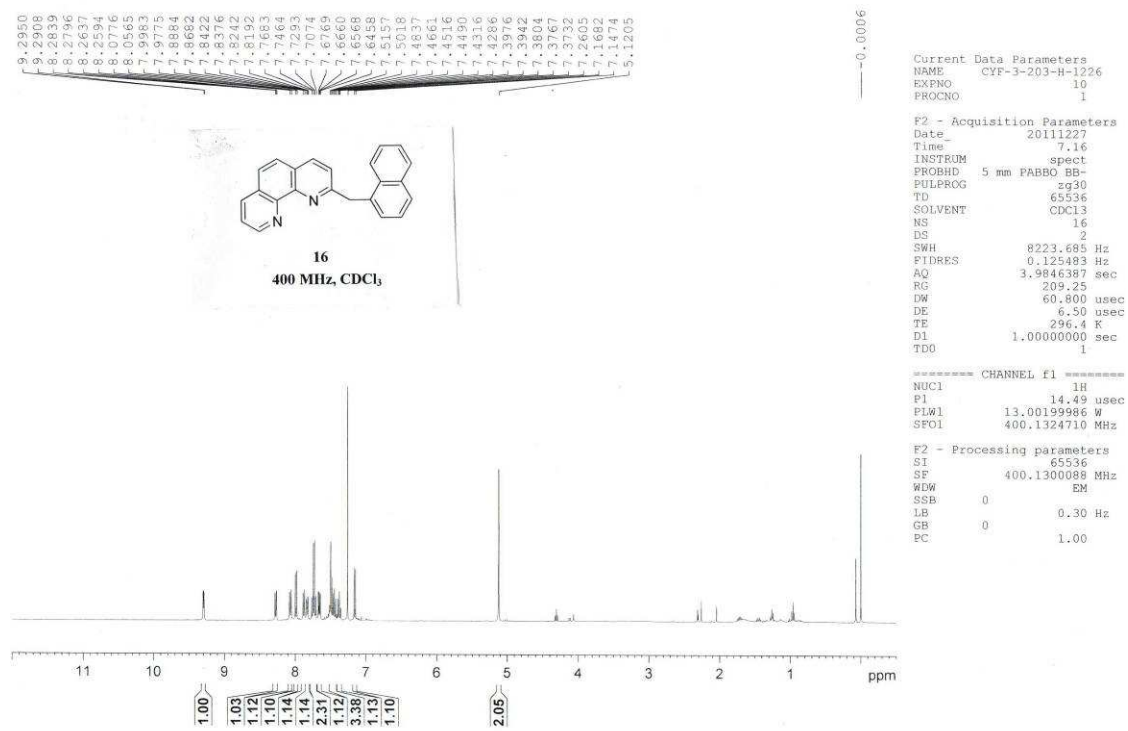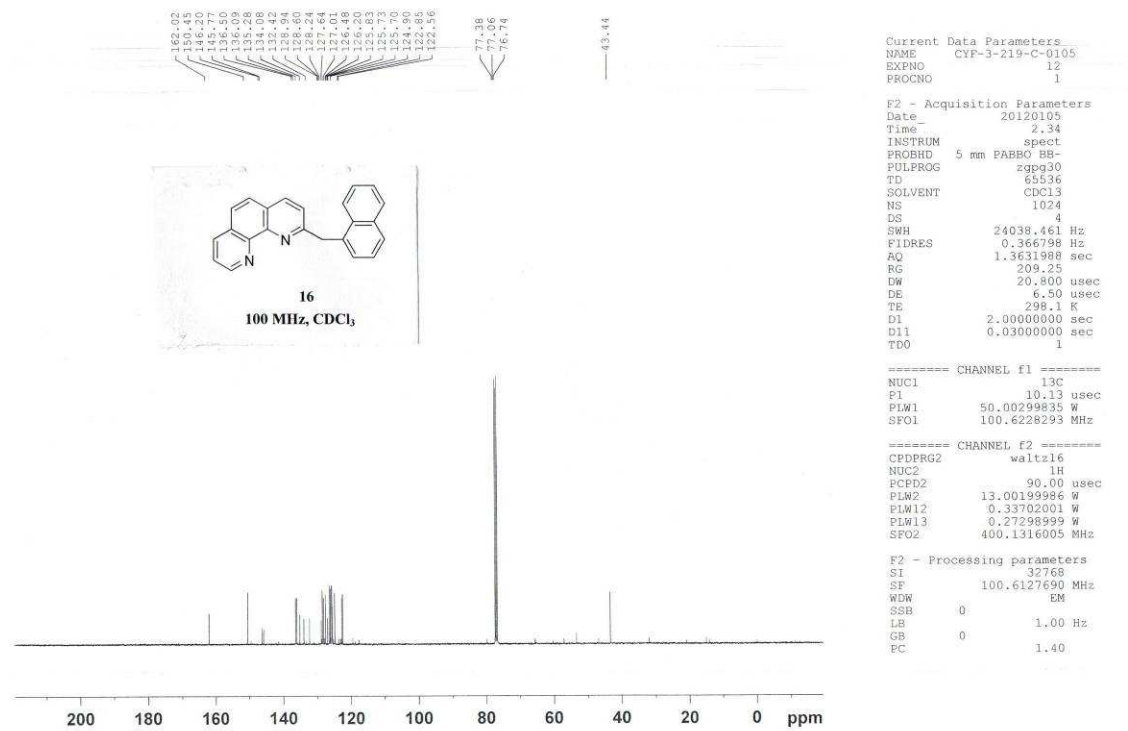

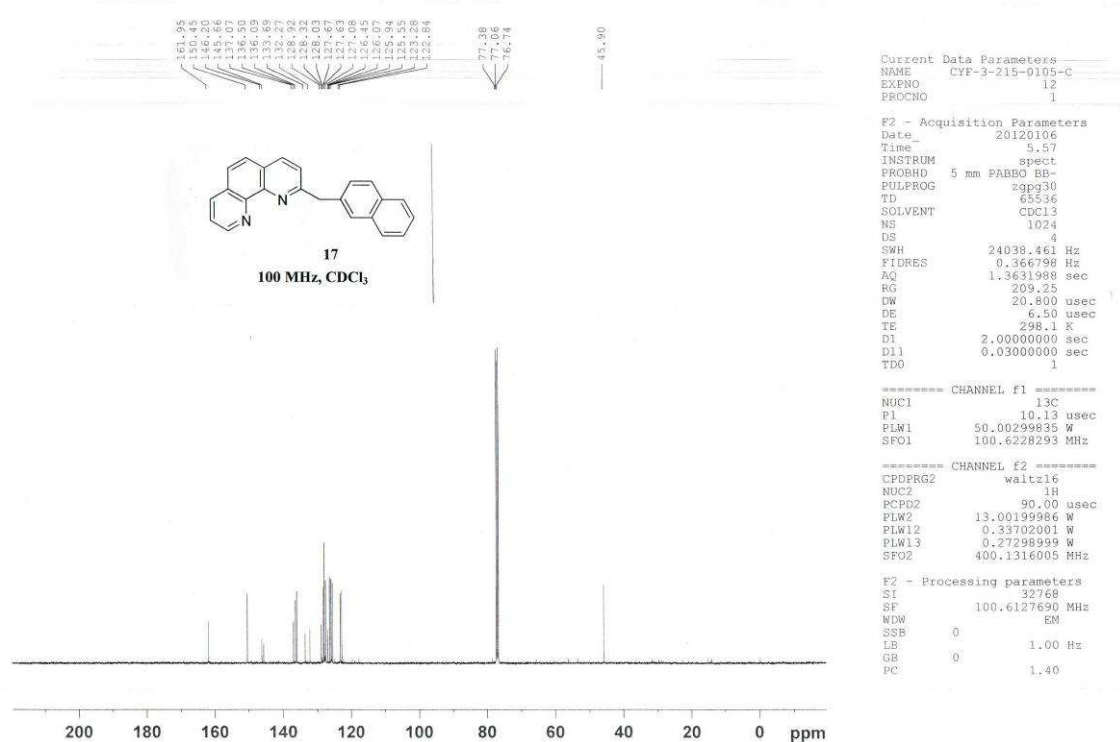

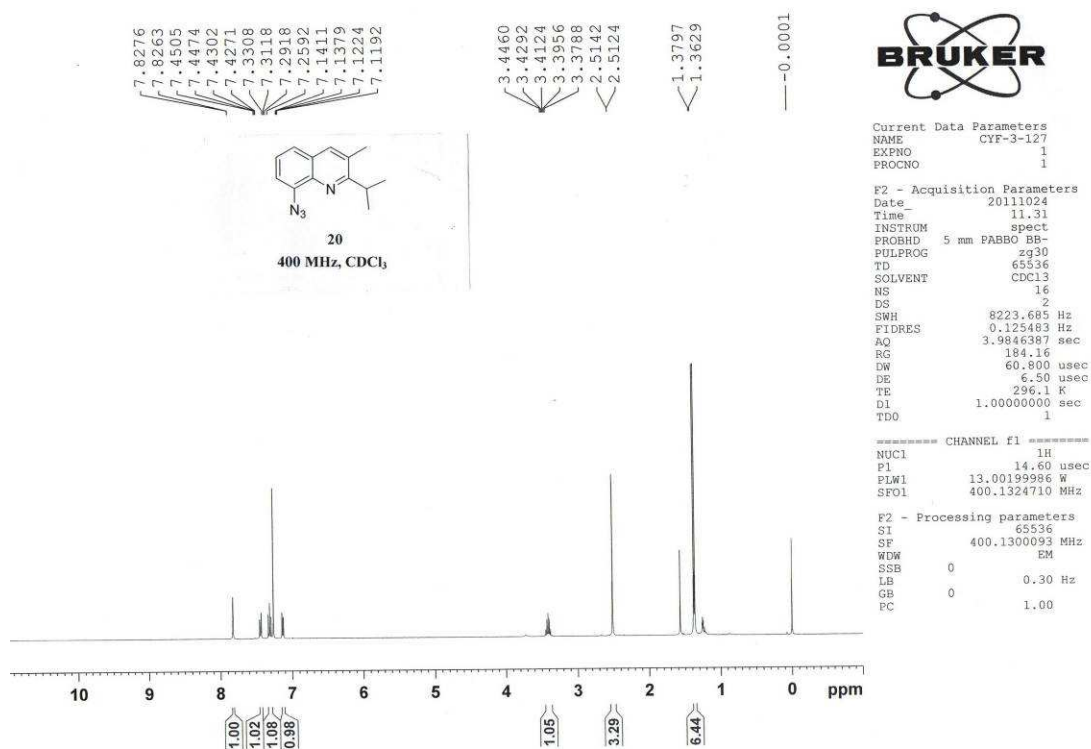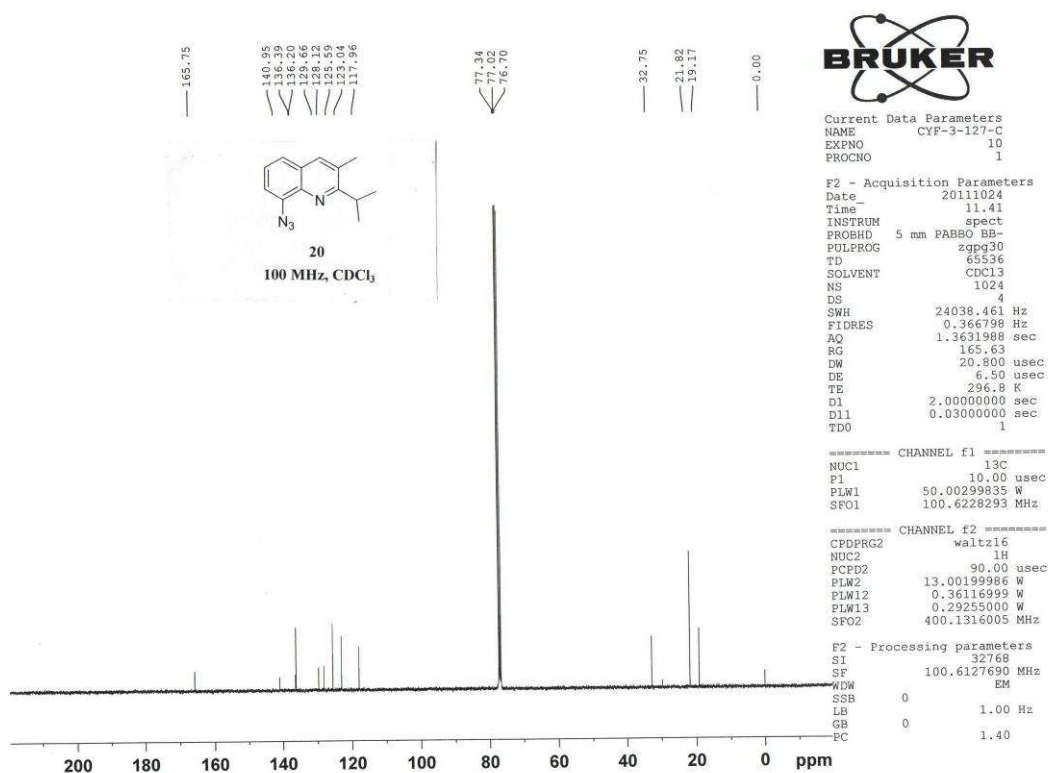

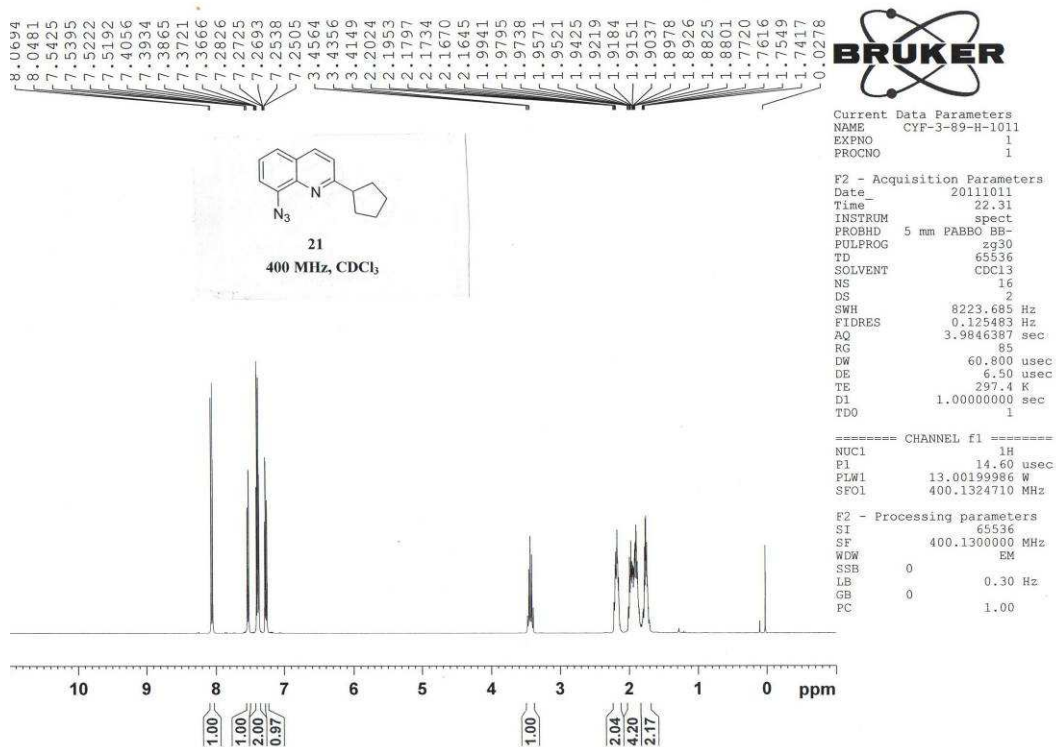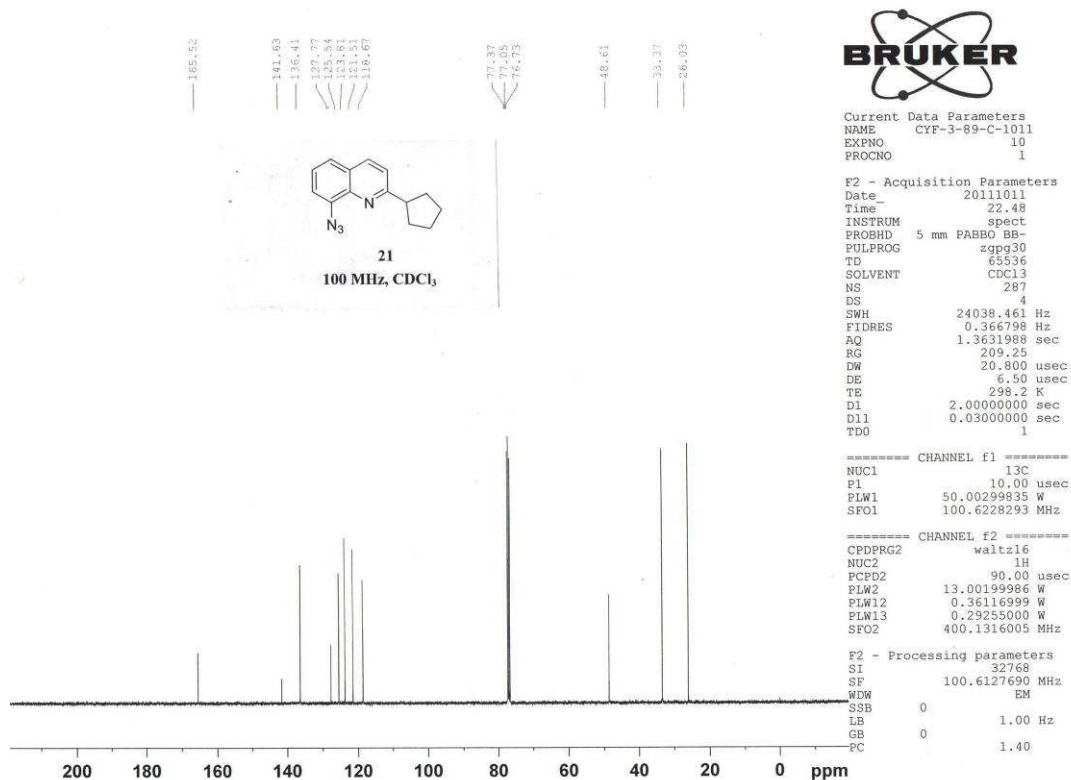

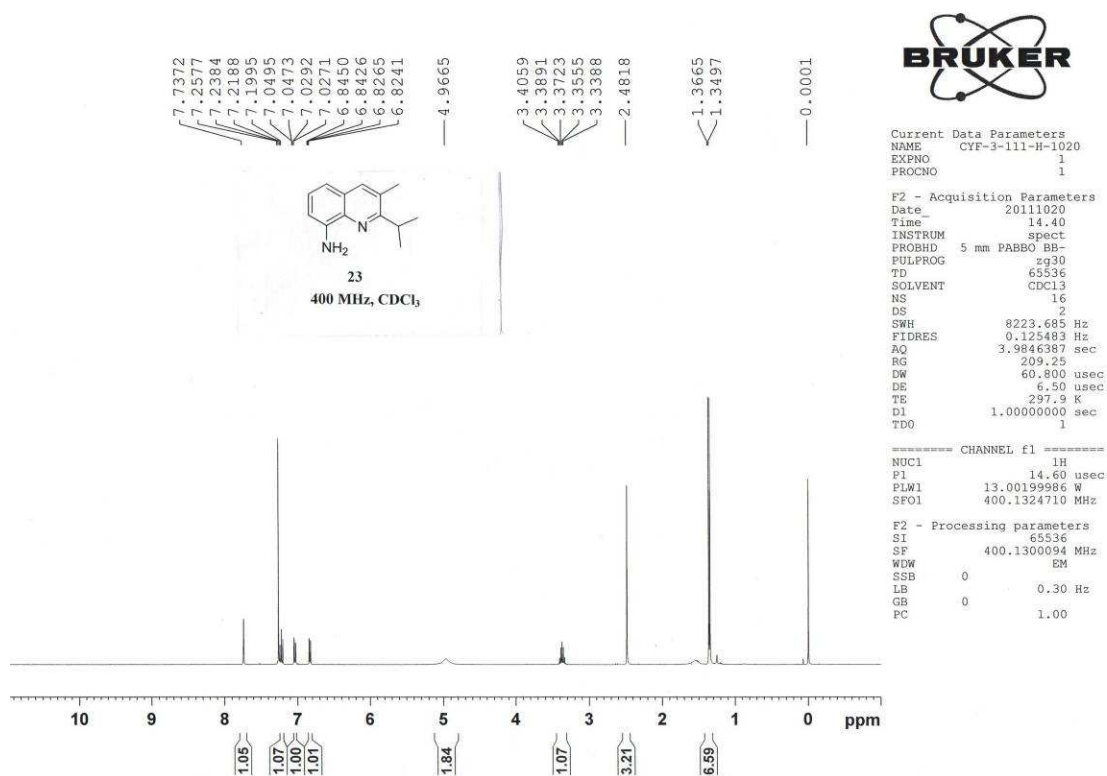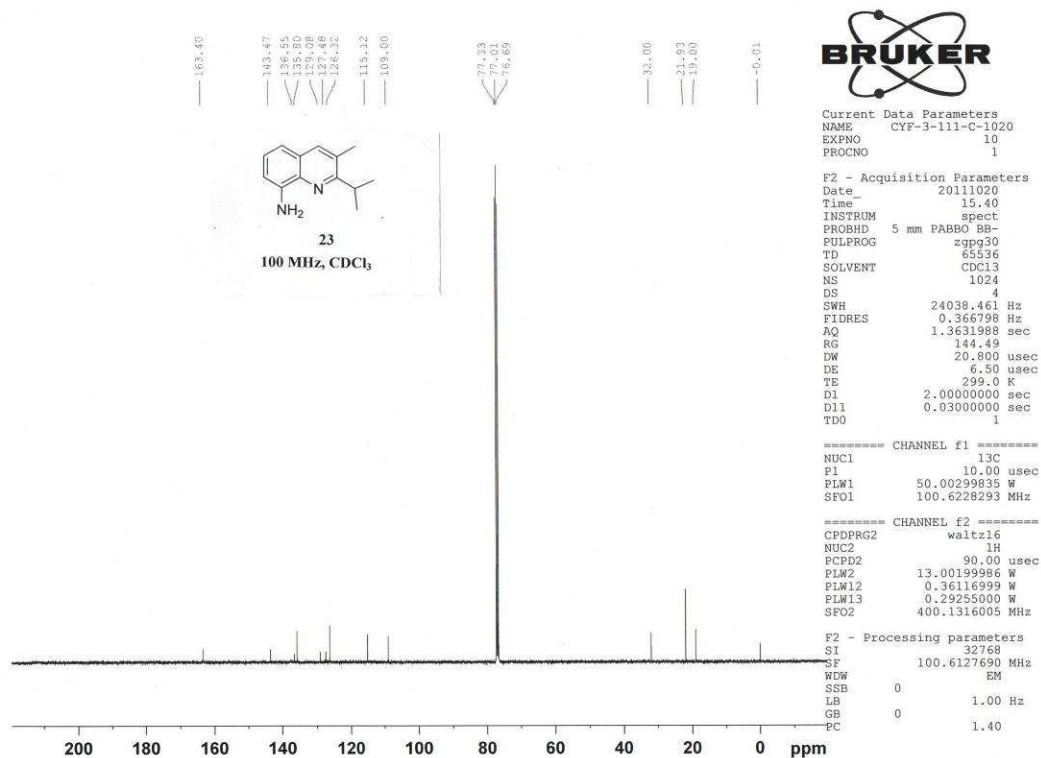

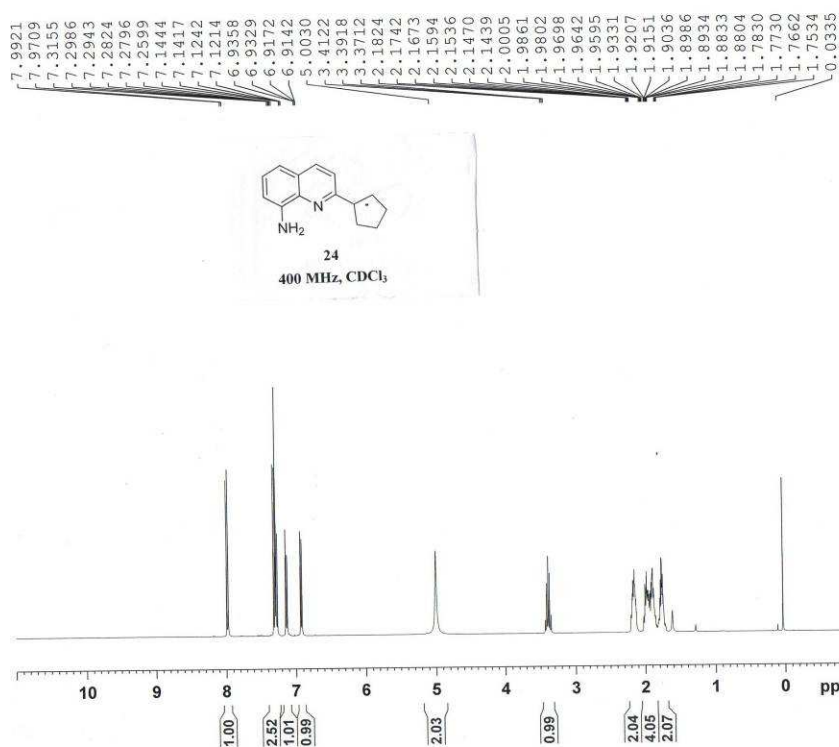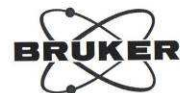

Current Data Parameters  
NAME CYP-3-105-H-1018  
EXPNO 1  
PROCNO 1

F2 - Acquisition Parameters  
Date 20111018  
Time 18.34  
INSTRUM spect  
PROBHD 5 mm PABBO BB-  
PULPROG zg30  
TD 65536  
SOLVENT CDC13  
NS 16  
DS 2  
SWH 8223.685 Hz  
FIDRES 0.125483 Hz  
AQ 3.9846387 sec  
RG 115.38  
DW 60.800 usec  
DE 6.50 usec  
TE 297.5 K  
D1 1.00000000 sec  
TDO 1

===== CHANNEL f1 =====  
NUC1 1H  
P1 14.60 usec  
PLW1 13.00199986 W  
SFO1 400.1324710 MHz

F2 - Processing parameters  
SI 65536  
SF 400.1300000 MHz  
WDW EM  
SSB 0  
LB 0.30 Hz  
GB 0  
PC 1.00

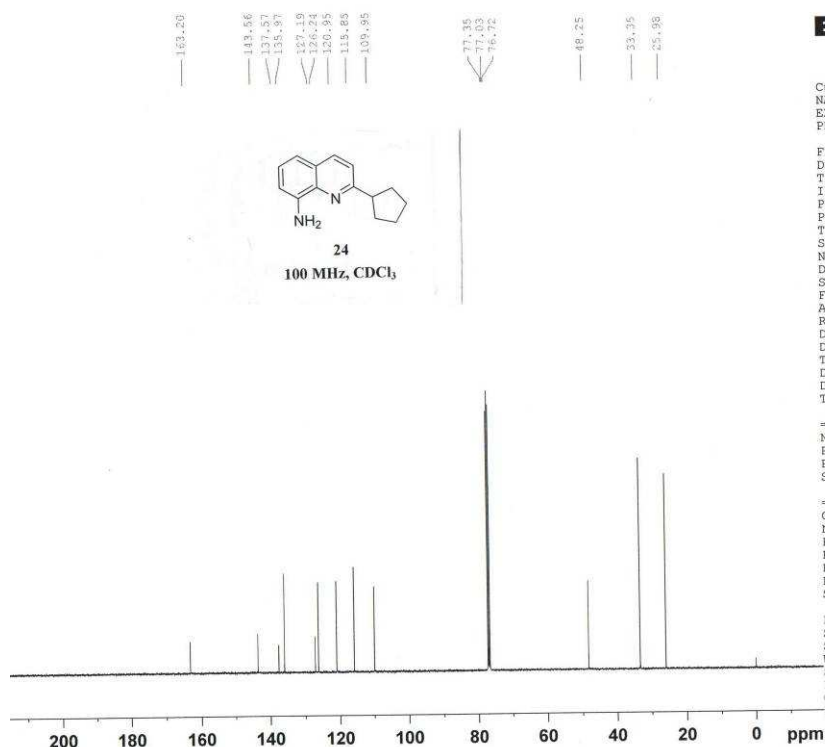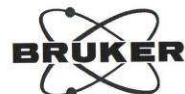

Current Data Parameters  
NAME CYP-3-105-C-1018  
EXPNO 1  
PROCNO 1

F2 - Acquisition Parameters  
Date 20111018  
Time 19.41  
INSTRUM spect  
PROBHD 5 mm PABBO BB-  
PULPROG zgpg30  
TD 65536  
SOLVENT CDC13  
NS 1024  
DS 4  
SWH 24038.461 Hz  
FIDRES 0.366798 Hz  
AQ 1.3631988 sec  
RG 184.16  
DW 20.800 usec  
DE 6.50 usec  
TE 298.3 K  
D1 2.00000000 sec  
D11 0.03000000 sec  
TDO 1

===== CHANNEL f1 =====  
NUC1 13C  
P1 10.00 usec  
PLW1 50.00299835 W  
SFO1 100.6228293 MHz

===== CHANNEL f2 =====  
CPDPRG2 waltz16  
NUC2 1H  
PCPD2 90.00 usec  
PLW2 13.00199986 W  
PLW12 0.36116999 W  
PLW13 0.29255000 W  
SFO2 400.1316005 MHz

F2 - Processing parameters  
SI 32768  
SF 100.6127690 MHz  
WDW EM  
SSB 0  
LB 1.00 Hz  
GB 0  
PC 1.40

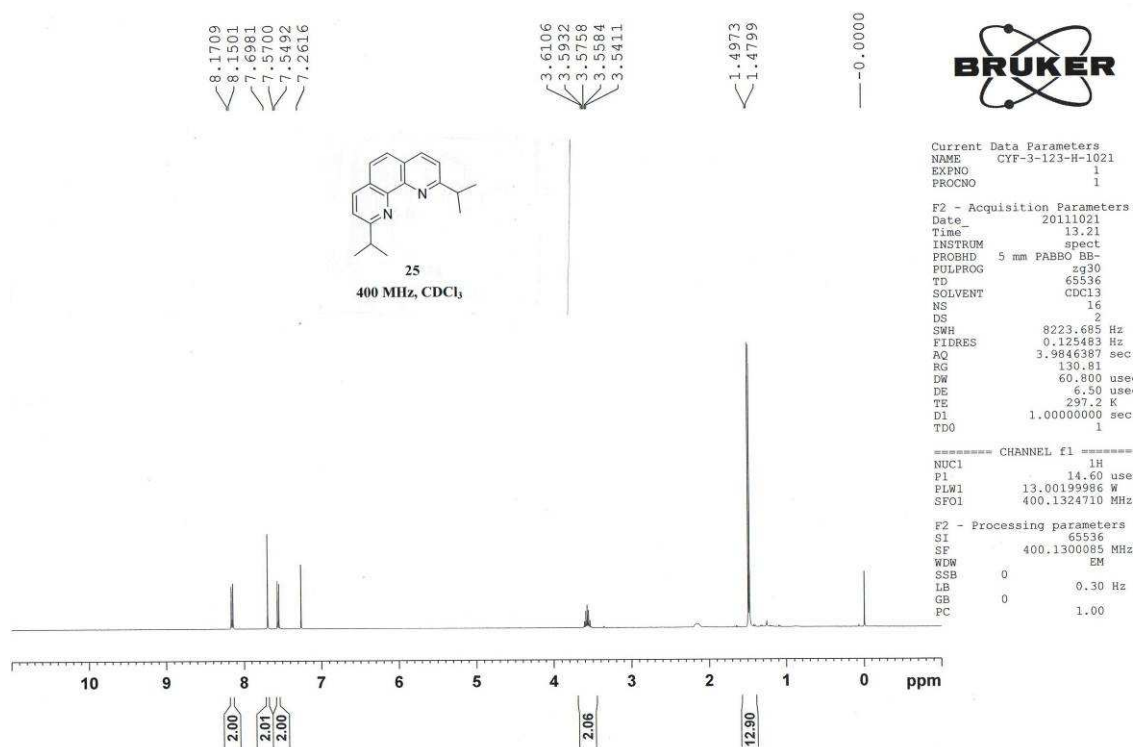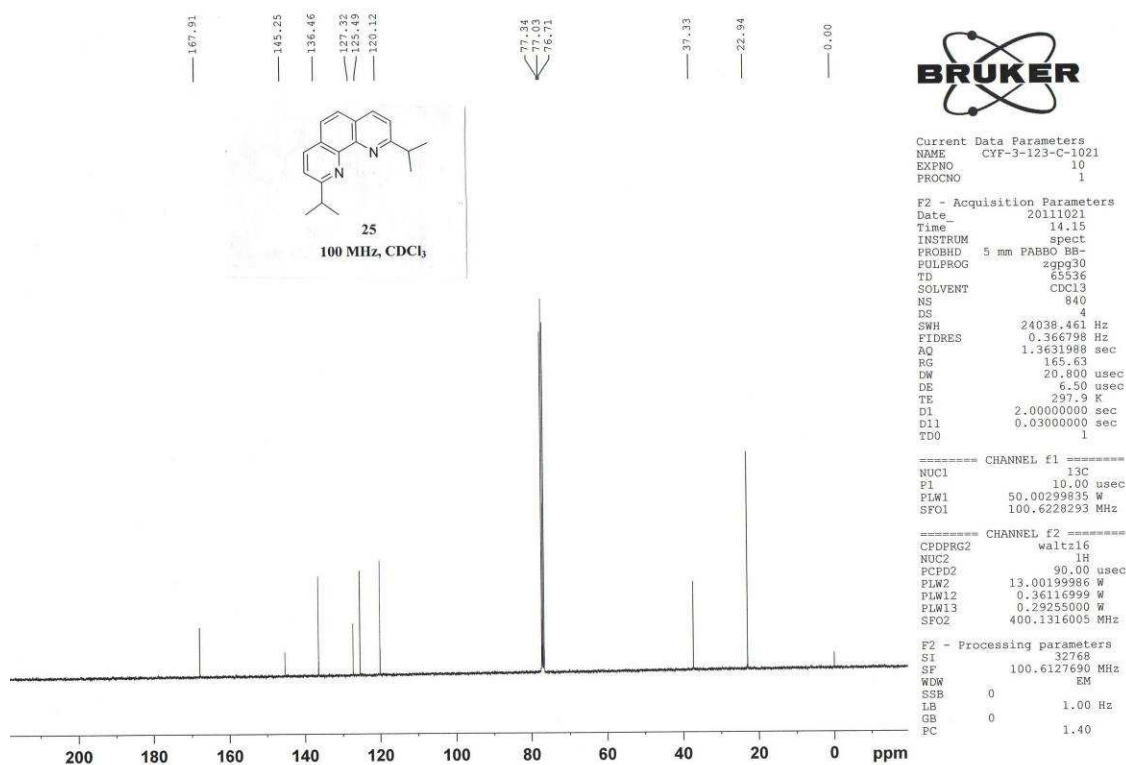

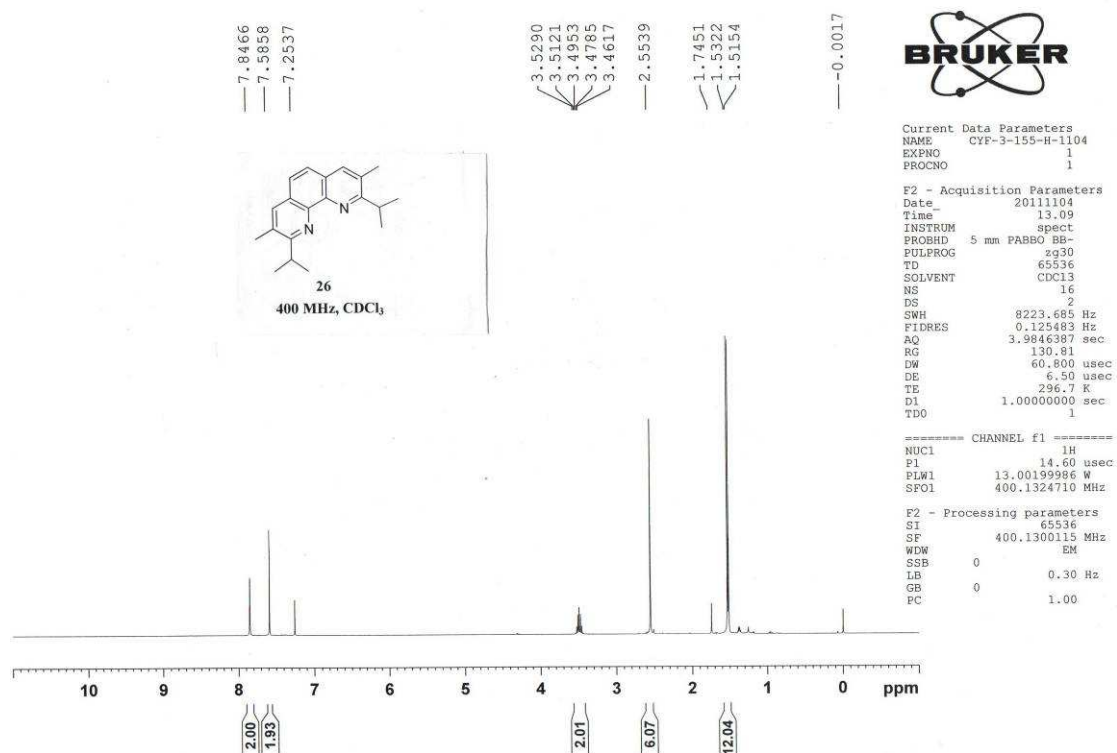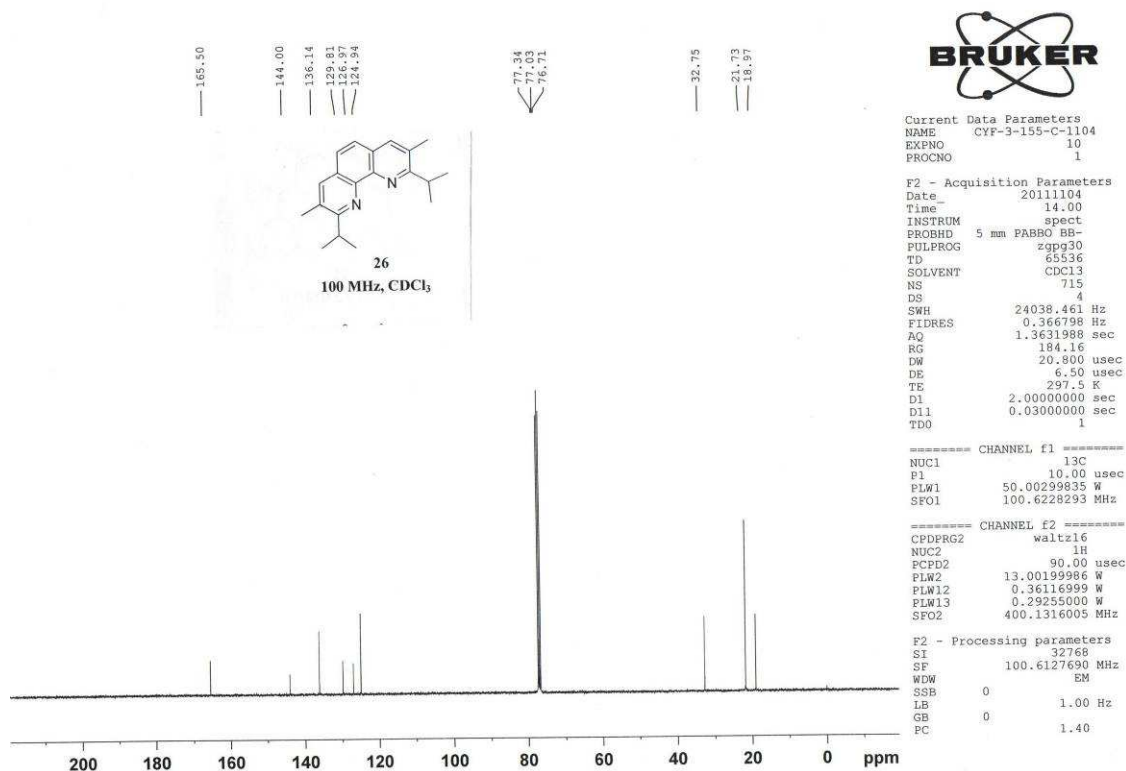

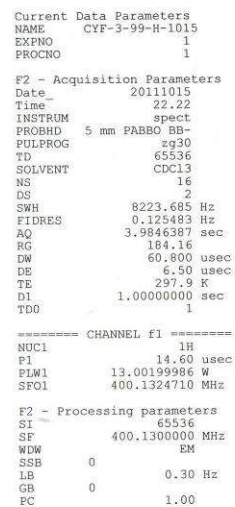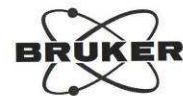

Supplement: c2cc17208a.pdf [file c2cc17208a.pdf]
